# Supplementary material
Source: PubMed Central journal article supplement (PMC10695268)
Supplement: ehp12956.s001.acco.pdf [file ehp12956.s001.acco.pdf]

**Note to readers with disabilities:** *EHP* strives to ensure that all journal content is accessible to all readers. However, some figures and Supplemental Material published in *EHP* articles may not conform to [508 standards](#) due to the complexity of the information being presented. If you need assistance accessing journal content, please contact [ehp508@niehs.nih.gov](mailto:ehp508@niehs.nih.gov). Our staff will work with you to assess and meet your accessibility needs within 3 working days.

### **Supplemental Material**

#### **Linking Prenatal Environmental Exposures to Lifetime Health with Epigenome-Wide Association Studies: State-of-the-Science Review and Future Recommendations**

Kelly M. Bakulski, Freida Blostein, and Stephanie J. London

#### **Table of Contents**

Prenatal environmental epigenome-wide association studies (EWAS) were identified through Pubmed, Web of Science, and Embase searches with the following terms.

#### **PubMed**

#### **Web of Science All Databases**

#### **Embase**

**Figure S1.** Inclusion and exclusion of studies for consideration in systemic review. Using the search terms described in the Supplementary Methods, we conducted a systemic review of epigenome-wide association studies. We excluded studies which were not epigenome-wide association studies (n=199) and studies which evaluated non-external exposures (n=27). We review in depth only studies that either performed replication in an independent sample or conducted a meta-analysis. We retained only EWAS of external exposures (n=134), excluding studies with only global or candidate methylation positions or examining non-exogenous exposures. We included studies using array or sequencing-based methods to measure methylation; 128 of the 134 exogenous exposure EWAS used the Illumina450K or EPIC arrays.

**Table S1.** Summary statistics on sample sizes of epigenome wide association studies.

**Table S2.** Complete data used to create Figure 2 from 134 epigenome wide association studies of external exposures. Please note not all rows included as data points in all facets of Figure 2, Figure 2 footnote explains exclusions.

## Supplementary Methods

Prenatal environmental epigenome-wide association studies (EWAS) were identified through Pubmed, Web of Science, and Embase searches with the following terms.

### PubMed

("Air Pollution"[Mesh] OR "Particulate Matter"[Mesh] OR "Vehicle Emissions"[Mesh] OR "Fossil Fuels"[Mesh] OR "Air Pollutants" [Pharmacological Action] OR "Air Pollutants, Occupational" [Pharmacological Action] OR "Volatile Organic Compounds"[Mesh] OR "Heating"[Mesh] OR "Cooking"[Mesh] OR "Dust"[Mesh:NoExp] OR "Radon"[Mesh] OR particulate-matter[tiab] OR smog[tiab] OR soot[tiab] OR PM2.5[tiab] OR "PM(2.5)"[tiab] OR PM10[tiab] OR "PM(10)"[tiab] OR carbon-black[tiab] OR black-carbon[tiab] OR elemental-carbon[tiab] OR ((air[tiab] OR airborne[tiab] OR coarse[tiab] OR ultrafine[tiab] OR fine[tiab]) AND (particle\*[tiab] OR particulate\*[tiab])) OR ((vehicle[tiab] OR vehicles[tiab] OR vehicular[tiab] OR auto[tiab] OR automobile[tiab] OR motor\*[tiab] OR bus[tiab] OR buses[tiab] OR car[tiab] OR truck\*[tiab] OR taxi[tiab] OR taxis[tiab] OR motorcycle\*[tiab] OR engine\*[tiab] OR traffic[tiab] OR road\*[tiab] OR street\*[tiab] OR highway\*[tiab] OR interstate\*[tiab] OR transport\*[tiab] OR factory[tiab] OR factories[tiab] OR industr\*[tiab] OR manufactur\*[tiab]) AND (emission\*[tiab] OR exhaust[tiab] OR fume\*[tiab])) OR sulfur-dioxide[tiab] OR SO2[tiab] OR ozone[tiab] OR O3[tiab] OR hydrogen-sulfide[tiab] OR H2S[tiab] OR carbon-monoxide[tiab] OR nitric-oxide[tiab] OR nitrogen-oxide[tiab] OR nitrogen-oxides[tiab] OR nitrogen-dioxide[tiab] OR NOx[tiab] OR "NO(x)"[tiab] OR NO2[tiab] OR volatile-organic-compound\*[tiab] OR VOCs[tiab] OR gasoline\*[tiab] OR diesel[tiab] OR petrol\*[tiab] OR burn-pit\*[tiab] OR ((wood[mesh] OR wood[tiab] OR firewood[tiab] OR biomass\* OR charcoal[tiab] OR fuel[tiab] OR fuels[tiab] OR gas[tiab] OR gasoline[tiab] OR kerosene[tiab] OR dung[tiab] OR manure[tiab]) AND (smoke[mesh] OR combust\*[tiab] OR burn\*[tiab] OR burning[tiab])) OR cooker\*[tiab] OR cooking[tiab] OR stove\*[tiab] OR oven\*[tiab] OR cookstove\*[tiab] OR cook-stove\*[tiab] OR woodstove\*[tiab] OR heater\*[tiab] OR fireplace\*[tiab] OR woodsmoke[tiab] OR dust[tiab] OR radon[tiab] OR "Allergens"[Mesh] OR "Pollen"[Mesh:NoExp] OR "Dander"[Mesh] OR "Mites"[Mesh] OR allerg\*[tiab] OR aeroallergen\*[tiab] OR dander[tiab] OR dustmite\*[tiab] OR mite[tiab] OR mites[tiab] OR cockroach\*[tiab] OR pollen[tiab] OR mold[tiab] OR housedust[tiab] OR "Diet, Food, and Nutrition"[Mesh] OR "Dietary Exposure"[Mesh] OR "Food Contamination"[Mesh:NoExp] OR "Aflatoxins"[Mesh] OR "Fluorides"[Mesh] OR "Mycotoxins"[Mesh] OR "Isoflavones"[Mesh] OR "Polybrominated Biphenyls"[Mesh] OR "Micronutrients"[Mesh] OR "Trace Elements"[Mesh] OR "Micronutrients" [Pharmacological Action] OR "Trace Elements" [Pharmacological Action] OR "Food Additives" [Pharmacological Action] OR "Antioxidants" [Pharmacological Action] OR "Malnutrition"[Mesh] OR "Fetal Alcohol Spectrum Disorders"[Mesh] OR "Drinking Water"[Mesh] OR "Antioxidants"[Mesh] OR "Iodine"[Mesh] OR "Sulfur"[Mesh] OR "Riboflavin"[Mesh] OR "Thiamine"[Mesh] OR "Folic Acid"[Mesh] OR "Ascorbic Acid"[Mesh] OR "Vitamin D"[Mesh] OR "Vitamin B Complex"[Mesh] OR "Vitamin A"[Mesh] OR "Vitamins" [Pharmacological Action] OR "Dietary Fats"[Mesh] OR "Flavonoids"[Mesh] OR "Alcoholic Beverages"[Mesh] OR "Alcohol-Related Disorders"[Mesh] OR diet[tiab] OR diets[tiab] OR dietary[tiab] OR breast-feeding[tiab] OR breast-fed[tiab] OR fasting[tiab] OR nutrition\*[tiab] caloric[tiab] OR calorie\*[tiab] OR nutrient\*[tiab] OR micronutrient\*[tiab] OR macronutrient\*[tiab] OR trace elements[tiab] OR Food-additive\*[tiab] OR total-fat[tiab] OR total-sugar\*[tiab] OR carbohydrate\*[tiab] OR fiber[tiab] OR folic-acid[tiab] OR folate[tiab] OR vitamin\*[tiab] OR ascorbic-acid[tiab] OR beta-carotene[tiab] OR biotin[tiab] OR calcium-ascorbate[tiab] OR choline[tiab] OR niacin[tiab] OR niacinamide[tiab] OR riboflavin[tiab] OR thiamine[tiab] OR sodium[tiab] OR iron[tiab] OR iodine[tiab] OR zinc[tiab] OR added-sugar\*[tiab] OR sucrose[tiab] OR glucose[tiab] OR fructose[tiab] OR lactose[tiab] OR maltose[tiab] OR galactose[tiab] OR starch[tiab] OR calcium[tiab] OR magnesium[tiab] OR phosphorus[tiab] OR potassium[tiab] OR copper[tiab] OR manganese[tiab] OR selenium[tiab] OR pantothenic-acid[tiab] OR betaine[tiab] OR retinol[tiab] OR beta-cryptoxanthin[tiab] OR lycopene[tiab] OR tocopherol[tiab] OR dihydrophyloquinone[tiab] OR menaquinone[tiab] OR fish[tiab] OR seafood[tiab] OR PUFA[tiab] OR PUFAs[tiab] OR LCPUFA[tiab] OR LCPUFAs[tiab] OR trans fat\*[tiab] OR saturated fat\*[tiab] OR monosaturated fat\*[tiab] OR fatty acid\*[tiab] OR mehg[tiab] OR omega-3[tiab] OR omega-6[tiab] OR methanol[tiab] OR "dietary sulfur"[tiab] OR antioxidant\*[tiab] OR multivitamin\*[tiab] OR mineral\*[tiab] OR flavinoids[tiab] OR Hydroxyvitamin-D[tiab] OR caffeine[tiab] OR Chromium[tiab] OR eating[tiab] OR eat[tiab] OR eats[tiab] OR food[tiab] OR alcohol\*[tiab] OR liquor[tiab] OR liquors[tiab] OR beer[tiab] OR wine[tiab] OR spirits[tiab] OR ((food[tiab] OR drinking water[tiab])

AND (contamination[tiab] OR contaminant\*[tiab])) OR mycotoxin\*[tiab] OR isoflavone\*[tiab] OR isoflavonoid\*[tiab] OR genistein[tiab] OR phytoestrogen\*[tiab] OR phytochemical\*[tiab] OR soy[tiab] OR soybean\*[tiab] OR "soy beans"[tiab] OR fluoride[tiab] OR "Dioxins and Dioxin-like Compounds"[Mesh] OR dioxane\*[tiab] OR dioxin\*[tiab] OR furan[tiab] OR furans[tiab] OR dibenzofuran\*[tiab] OR heptachlorodibenzodioxin[tiab] OR HpCDD[tiab] OR HCDD[tiab] OR hexachlorodibenzodioxin[tiab] OR HxCDD[tiab] OR PeCDD[tiab] OR dibenzodioxin\*[tiab] OR PCDD[tiab] OR Tetrachlorodibenzodioxin[tiab] OR TCDD[tiab] OR Heptachlorodibenzofuran[tiab] OR Hexachlorodibenzofuran[tiab] OR Octachlorodibenzofuran[tiab] OR pentachlorodibenzofuran[tiab] OR tetrachlorodibenzofuran[tiab] OR TCDF[tiab] OR (endocrine[tiab] AND disrupt\*[tiab]) OR bisphenol[tiab] OR BPA[tiab] OR dinitrobisphenol[tiab] OR tetrabromobisphenol[tiab] OR "2,2-bis(4-hydroxyphenyl)propane"[tiab] OR 4-tert-octylphenol[tiab] OR p-tert-octylphenol[tiab] OR 4-tertiary-octylphenol[tiab] OR "p-(1,1,3,3-tetramethylbutyl)-phenol"[tiab] OR triclocarban[tiab] OR trichlorocarbanilide[tiab] OR trichlorocarban[tiab] OR Triclosan[tiab] OR butylparaben[tiab] OR hydroxybenzoate[tiab] OR ethylparaben[tiab] OR methylparaben[tiab] OR polychlorinated biphenyl\*[tiab] OR PCB[tiab] OR PCBs[tiab] OR Tetrachlorobiphenyl[tiab] OR pentachlorobiphenyl[tiab] OR hexachlorobiphenyl[tiab] OR Heptachlorobiphenyl[tiab] OR trichlorobiphenyl[tiab] OR Octachlorobiphenyl[tiab] OR Nonachlorobiphenyl[tiab] OR Decachlorobiphenyl[tiab] OR diethylstilbestrol[tiab] OR stilbestrol[tiab] OR stilbene-estrogen[tiab] OR xenoestrogen\*[tiab] OR tributyltin[tiab] OR nonylphenol[tiab] OR ethynylestradiol\*[tiab] OR "Electronic Waste"[Mesh] OR electronic-waste\*[tiab] OR electronics-waste\* OR electronic-scrap\*[tiab] OR Electronics-recycling[tiab] OR e-scrap\*[tiab] OR e-waste\*[tiab] OR EWRSS[tiab] OR Scrap-computer\*[tiab] OR waste-electronic\*[tiab] OR WEEE[tiab] OR ((electronic\*[tiab] OR cell phone[tiab] OR cellular phone[tiab] OR mobile phone\*[tiab] OR computer[tiab] OR television\*[tiab] OR "TV"[tiab] OR "TVs"[tiab] OR laptop\*[tiab] OR tablet\*[tiab] OR mobile-device\*[tiab] OR MP3-player\*[tiab] OR CD-player\*[tiab] OR DVD-player\*[tiab] OR sound-system[tiab] OR home-entertainment\*[tiab] OR camera\*[tiab] OR game-console\*[tiab] OR calculator\*[tiab] OR circuit-board\*[tiab] OR mother-board\*[tiab] OR motherboard\*[tiab] OR crt-funnel-glass[tiab] OR liquid-crystal[tiab] OR amoled[tiab] OR LCD[tiab] OR cathode-ray-tube\*[tiab] OR battery[tiab] OR batteries[tiab]) AND ("Recycling"[Mesh] OR "Refuse Disposal"[Mesh] OR "Solid Waste"[Mesh] OR waste[tiab] OR recycle\*[tiab] OR disposal\*[tiab] OR scrap[tiab] OR scrapped[tiab] OR scraps[tiab])) OR "Flame Retardants"[Mesh] OR "Flame Retardants" [Pharmacological Action] OR "Halogenated Diphenyl Ethers"[Mesh] OR "tris(2,3-dibromopropyl)phosphate" [Supplementary Concept] OR "bis(1-chloro-2-propyl)phosphate" [Supplementary Concept] OR "bis(2-butoxyethyl)phosphate" [Supplementary Concept] OR fire-retard\*[tiab] OR flame-retard\*[tiab] OR fire-proofing[tiab] OR ((halogenated[tiab] OR chlorinated[tiab] OR brominated[tiab] OR polybrominated[tiab]) AND (diphenyl-ether\*[tiab])) OR PBDE\*[tiab] OR PCDE\*[tiab] OR BDE[tiab] OR tribrominated diphenyl ether[tiab] OR tribromodiphenyl ether[tiab] OR tetrabromodiphenyl ether[tiab] OR brominated diphenyl ether[tiab] OR tetraBDE[tiab] OR tetrabrominated diphenyl ether[tiab] OR pentabromodiphenyl ether[tiab] OR pentaBDE[tiab] OR hexabromodiphenyl ether[tiab] OR hexabromodiphenyl[tiab] OR hexaBDE[tiab] OR heptabromodiphenyl ether[tiab] OR HeptaBDE[tiab] OR hexabromocyclododecane[tiab] OR HBCD[tiab] OR 345-HBB[tiab] OR 245-HBB[tiab] OR PBB-153[tiab] OR PBB153[tiab] OR asbestos[tiab] OR TDBPP[tiab] OR "Environmental Pollution"[Mesh] OR "Environmental Pollutants" [Pharmacological Action] OR "Toxic Actions"[Mesh] OR "Environmental Health"[Mesh] OR "Disorders of Environmental Origin"[Mesh] OR "Ecotoxicology"[Mesh] OR "Carcinogens, Environmental" [Pharmacological Action] OR "Hazardous Substances" [Pharmacological Action] OR "Neurotoxins" [Pharmacological Action] OR "Noxae" [Pharmacological Action] OR "Mutagens" [Pharmacological Action] OR "Teratogens" [Pharmacological Action] OR "Soil Pollutants" [Pharmacological Action] OR "Water Pollutants, Chemical" [Pharmacological Action] OR "Radioactive Pollutants"[Mesh] OR Environmental-agent\*[tiab] OR environmental-chemical\*[tiab] OR environmental-compound\*[tiab] OR environmental-contaminant\*[tiab] OR environmental-determinant\*[tiab] OR environmental-estrogen\*[tiab] OR environmental-exposure\*[tiab] OR carcinogen\*[tiab] OR teratogen\*[tiab] OR mutagen\*[tiab] OR epimutagen\*[tiab] OR pollut\*[tiab] OR cardiotox\*[tiab] OR ecotox\*[tiab] OR toxicant[tiab] OR toxicants[tiab] OR toxin\*[tiab] OR xenobiotic[tiab] OR xenobiotics[tiab] OR xenochemical\*[tiab] OR chemical-compound\*[tiab] OR chemical-exposure\*[tiab] OR chemical-mixture\*[tiab] OR chemical-product\*[tiab] OR chemical-substance\*[tiab] OR chemical-hazard\*[tiab] OR synthetic-chemical\*[tiab] OR hazardous-compound\*[tiab] OR hazardous-exposure\*[tiab] OR hazardous-mixture\*[tiab] OR hazardous-material\* OR hazardous-product\*[tiab] OR hazardous-substance\*[tiab] OR industrial-compound\*[tiab] OR industrial-chemical\*[tiab] OR biohazard\*[tiab] OR "Household Products"[Mesh] OR "Cosmetics"[Mesh] OR personal product\*[tiab] OR cosmetics[tiab] OR cosmetic product\*[tiab] OR care product\*[tiab] OR consumer product\*[tiab] OR commercial product\*[tiab] OR cleaning product\*[tiab] OR household product\*[tiab] OR consumer goods[tiab] OR makeup[tiab] OR make-up[tiab] OR toys[tiab] OR

plastic container\*[tiab] OR food container\*[tiab] OR "Metals, Heavy"[Mesh] OR "Heavy Metal Poisoning"[Mesh] OR "Heavy Metal Poisoning, Nervous System"[Mesh] OR "Methylmercury Compounds"[Mesh] OR heavy metal[tiab] OR heavy metals[tiab] OR toxic metal[tiab] OR toxic metals[tiab] OR synthetic metal[tiab] OR synthetic metals[tiab] OR arsenic[tiab] OR arsenical\*[tiab] OR arsenite\*[tiab] OR arsenate\*[tiab] OR ((Titanium[tiab] OR Vanadium[tiab] OR Chromium[tiab] OR Manganese[tiab] OR Iron[tiab] OR Cobalt[tiab] OR Nickel[tiab] OR Copper[tiab] OR Zinc[tiab] OR Gallium[tiab] OR Germanium[tiab] OR Zirconium[tiab] OR Niobium[tiab] OR Molybdenum[tiab] OR Technetium[tiab] OR Ruthenium[tiab] OR Rhodium[tiab] OR Palladium[tiab] OR Silver[tiab] OR Cadmium[tiab] OR Indium[tiab] OR Tin[tiab] OR Tellurium[tiab] OR Lutetium[tiab] OR Hafnium[tiab] OR Tantalum[tiab] OR Tungsten[tiab] OR Rhenium[tiab] OR Osmium[tiab] OR Iridium[tiab] OR Platinum[tiab] OR Gold[tiab] OR Mercury[tiab] OR Methylmercury[tiab] OR Thallium[tiab] OR Bismuth[tiab] OR Polonium[tiab] OR Astatine[tiab] OR Lanthanum[tiab] OR Cerium[tiab] OR Praseodymium[tiab] OR Neodymium[tiab] OR Promethium[tiab] OR Samarium[tiab] OR Europium[tiab] OR Gadolinium[tiab] OR Terbium[tiab] OR Dysprosium[tiab] OR Holmium[tiab] OR Erbium[tiab] OR Thulium[tiab] OR Ytterbium[tiab] OR Actinium[tiab] OR Thorium[tiab] OR Protactinium[tiab] OR Uranium[tiab] OR Neptunium[tiab] OR Plutonium[tiab] OR Americium[tiab] OR Curium[tiab] OR Berkelium[tiab] OR Californium[tiab] OR Einsteinium[tiab] OR Fermium[tiab] OR Nobelium[tiab] OR Radium[tiab] OR Lawrencium[tiab] OR Rutherfordium[tiab] OR Dubnium[tiab] OR Seaborgium[tiab] OR Bohrium[tiab] OR Hassium[tiab] OR Meitnerium[tiab] OR Darmstadtium[tiab] OR Roentgenium[tiab] OR Copernicium[tiab]) AND (poison\*[tiab] OR exposure\*[tiab] OR exposed[tiab] OR contaminat\*[tiab] OR dietary[tiab] OR blood[tiab] OR serum[tiab] OR urine[tiab] OR urinary[tiab])) OR blood-lead[tiab] OR (lead[tiab] AND PB[tiab]) OR lead exposure\*[tiab] OR dietary lead[tiab] OR lead poisoning[tiab] OR lead-level\*[tiab] OR "Polycyclic Aromatic Hydrocarbons"[Mesh] OR "Benzene"[Mesh] OR polycyclic-aromatic-hydrocarbons[tiab] OR PAHs[tiab] OR fumonisin[tiab] OR benzopyrene[tiab] OR benzo-a-pyrene[tiab] OR "3,4-benzopyrene"[tiab] OR hydroxypyrene[tiab] OR benzene[tiab] OR toluene[tiab] OR xylene[tiab] OR "Pesticides" [Pharmacological Action] OR "Herbicides" [Pharmacological Action] OR "Insecticides" [Pharmacological Action] OR "Rodenticides" [Pharmacological Action] OR Pesticid\*[tiab] OR fungicide\*[tiab] OR herbicide\*[tiab] OR insecticide\*[tiab] OR insect-repellent\*[tiab] OR rodenticide\*[tiab] OR acaricide\*[tiab] OR algicide\*[tiab] OR biopesticide\*[tiab] OR fumigant\*[tiab] OR molluscicide\*[tiab] OR nematocide\*[tiab] OR weed-killer\*[tiab] OR pest control[tiab] OR organochlorin\*[tiab] OR organic-chlorine[tiab] OR chlorinated-hydrocarbon\*[tiab] OR aldrin[tiab] OR chlordan[tiab] OR chlordane[tiab] OR chlordecone[tiab] OR chlorobenzene\*[tiab] OR chlorofluorocarbon[tiab] OR chlorofluorocarbons[tiab] OR dichlorodiphenyltrichloroethane\*[tiab] OR DDT[tiab] OR Dichlorodiphenyldichloroethylene[tiab] OR DDE[tiab] OR dieldrin[tiab] OR endrin[tiab] OR heptachlor[tiab] OR hexachlorobenzene[tiab] OR hexachlorocyclohexane[tiab] OR alpha-HCH[tiab] OR beta-HCH[tiab] OR lindane[tiab] OR hexachlorocyclohexane[tiab] OR methoxychlor[tiab] OR mirex[tiab] OR polychlorinated-biphenyl\*[tiab] OR "polychlorinated biphenyls"[tiab] OR polychlorobiphenyl[tiab] OR PCBs[tiab] OR tetrachloroethylene[tiab] OR trichloroethane\*[tiab] OR vinyl-chloride[tiab] OR agent-orange[tiab] OR Amitraz[tiab] OR atrazine[tiab] OR avermectin[tiab] OR captan[tiab] OR carbaryl[tiab] OR carbofuran[tiab] OR chlorfenvinphos[tiab] OR chlorpyrifos[tiab] OR coumaphos[tiab] OR deet[tiab] OR "N,N-diethyltoluamide"[tiab] OR diazinon[tiab] OR dichlorvos[tiab] OR "dimethyl phthalate"[tiab] OR endosulfan\*[tiab] OR linalool[tiab] OR malathion[tiab] OR paraquat[tiab] OR parathion[tiab] OR pentachlorobenzene[tiab] OR PeCB[tiab] OR pentachlorophenol[tiab] OR permethrin[tiab] OR pyrethrin\*[tiab] OR rotenone[tiab] OR vinclozolin[tiab] OR omethoate[tiab] OR dichlorophenol[tiab] OR "2,5-DCP"[tiab] OR dichlorophenol[tiab] OR "2,4-DCP"[tiab] OR trichlorophenol[tiab] OR "2,4,5-TCP"[tiab] OR trichlorophenol[tiab] OR "2,4,6-TCP"[tiab] OR "Phthalic Acids"[Mesh] OR "Plasticizers"[Mesh] OR "Plasticizers" [Pharmacological Action] OR phthalate\*[tiab] OR butylbenzenesulfonamide[tiab] OR plasticizers[tiab] OR MEOHP[tiab] OR MEHP[tiab] OR DEHP[tiab] OR "Bis(2-ethylhexyl)phthalate"[tiab] OR "Solvents"[Pharmacological Action] OR solvents[tiab] OR organic-solvent[tiab] OR "2-bromopropane"[tiab] OR "2-propanol"[tiab] OR acetone[tiab] OR tetrachloroethylene[tiab] OR toluene[tiab] OR trichloroethylene[tiab] OR "tobacco smoke pollution"[mesh] OR "Smoking"[Mesh] OR "Smokers"[Mesh] OR "secondhand smoke"[tiab] OR "secondhand smoking"[tiab] OR "second hand smoke"[tiab] OR "second hand smoking"[tiab] OR "passive smoke"[tiab] OR "passive smoking"[tiab] OR "involuntary smoking" OR cotinine[tiab] OR nicotine[tiab] OR ((smoke[tiab] OR smoking[tiab] OR smoker\*[tiab]) AND (cigarette\*[tiab] OR tobacco[tiab])) OR "Sociological Factors"[Mesh] OR "Social Behavior"[Mesh] OR "Social Environment"[Mesh] OR "Financial Stress"[Mesh] OR "Occupational Stress"[Mesh] OR "Historical Trauma"[Mesh] OR "Burnout, Psychological"[Mesh] OR "Caregiver Burden"[Mesh] OR "Minority Health"[Mesh] OR "Social Problems"[Mesh] OR "Social Discrimination"[Mesh] OR "Prejudice"[Mesh] OR "Family Characteristics"[Mesh] OR "Social Determinants of Health"[Mesh] OR "Residence Characteristics"[Mesh] OR

"Life Style"[Mesh] OR "Socioeconomic Factors"[Mesh] OR "Vulnerable Populations"[Mesh] OR "Homeless Persons"[Mesh] OR "Transients and Migrants"[Mesh] OR "Disaster Victims"[Mesh] OR "Refugees"[Mesh] OR "Occupational Groups"[Mesh] OR "Working Poor"[Mesh] OR "Agricultural Workers' Diseases"[Mesh] OR "Occupational Exposure"[Mesh] OR social stress\*[tiab] OR financial stress\*[tiab] OR psychosocial[tiab] OR socioeconomic[tiab] OR social determinants[tiab] OR social factors[tiab] OR sociological factors[tiab] OR minority health[tiab] OR discrimination[tiab] OR discriminated[tiab] OR prejudice[tiab] OR prejudices[tiab] OR prejudiced[tiab] OR racism[tiab] OR racist[tiab] OR segregat\*[tiab] OR sexism[tiab] OR sexist[tiab] OR ableism[tiab] OR ableist[tiab] OR homophob\*[tiab] OR agist[tiab] OR agism[tiab] OR classism[tiab] OR classist[tiab] OR xenophobi\*[tiab] OR Marginalize\*[tiab] OR stigma[tiab] OR stigmatize\*[tiab] OR Microaggress\*[tiab] OR micro-aggress\*[tiab] OR sedentary[tiab] OR exercise\*[tiab] OR screen-time[tiab] OR life-choices[tiab] OR lifestyle\*[tiab] OR life-style\*[tiab] OR neighborhood\*[tiab] OR neighbourhoood\*[tiab] OR greenspace[tiab] OR greenspaces[tiab] OR green space[tiab] OR green spaces[tiab] OR "health equity"[tiab] OR "health inequalities"[tiab] OR "health inequality"[tiab] OR "health justice"[tiab] OR "health injustices"[tiab] OR vulnerable population\*[tiab] OR sensitive population\*[tiab] OR underserved population\*[tiab] OR special population\*[tiab] OR indigent\*[tiab] OR homeless\*[tiab] OR squatter\*[tiab] OR migrant\*[tiab] OR disaster victim\*[tiab] OR poverty[tiab] OR working poor[tiab] OR disadvantage[tiab] OR disadvantaged[tiab] OR out-of-work[tiab] OR jobless[tiab] OR unemploy\*[tiab] OR foreclosure[tiab] OR foreclosed[tiab] OR home-owner\*[tiab] OR refugee\*[tiab] OR displaced[tiab] OR farmer\*[tiab] OR agricultural-worker\*[tiab] OR farm-hand\*[tiab] OR laborer\*[tiab] OR worker\*[tiab] OR miner\*[tiab] OR police\*[tiab] OR military[tiab] OR first responder\*[tiab] OR firefighter\*[tiab] OR occupational[tiab] OR ethnic\*[tiab] OR race[tiab] OR races[tiab] OR racial[tiab] OR racially[tiab] OR minorit\*[tiab] OR nonwhite\*[tiab] OR non-white\*[tiab] OR people of color[tiab] OR women of color[tiab] OR black\*[tiab] OR african-american\*[tiab] OR afro-american\*[tiab] OR asian-american\*[tiab] OR Chinese-american\*[tiab] OR Korean-american\*[tiab] OR Japanese-american\*[tiab] OR filipino[tiab] OR filipina[tiab] OR arab-american\*[tiab] OR native-hawaiian\*[tiab] OR pacific-islander\*[tiab] OR native-american\*[tiab] OR american-indian\*[tiab] OR alaska-native\*[tiab] OR first people\*[tiab] OR caribbean-american\*[tiab] OR caribbean-islander\*[tiab] OR Spanish-american\*[tiab] OR hispanic\*[tiab] OR latina\*[tiab] OR latino\*[tiab] OR latinx[tiab] OR Mexican-american\*[tiab] OR tejano[tiab] OR meso-american\*[tiab] OR mestizo[tiab] OR puerto-rican\*[tiab] OR Cuban\*[tiab] OR Dominican\*[tiab] OR criollo[tiab] OR "adverse childhood"[tiab] OR adverse experience\*[tiab] OR adversity[tiab] OR adversities[tiab] OR abuse[tiab] OR violence[tiab] OR "traumatic childhood"[tiab] OR traumatic experience\*[tiab] OR "traumatic early life"[tiab] OR "childhood trauma"[tiab] OR "early life trauma"[tiab] OR "violent childhood"[tiab] OR "troubled childhood"[tiab] OR "childhood maltreatment"[tiab] OR "child maltreatment"[tiab] OR "childhood mistreatment"[tiab] OR "child mistreatment"[tiab] OR "early life adverse"[tiab] OR "early adverse life"[tiab] OR "early life stress"[tiab] OR "childhood neglect"[tiab] OR "child neglect"[tiab] OR psychological trauma[tiab]) AND ("DNA Methylation"[Mesh] OR ("DNA"[Mesh] AND "Methylation"[Mesh]) OR "Epigenesis, Genetic"[Mesh] OR "Epigenome"[Mesh] OR "Epigenomics"[Mesh] OR "Genome-Wide Association Study"[Mesh] OR EWAS[tiab] OR 450k[tiab] OR 450 k[tiab] OR HM450K[tiab] OR HumanMethylation450K[tiab] OR Illumina450K[tiab] OR 850k[tiab] OR 850 k[tiab] OR HM850K[tiab] OR Illumina[tiab] OR 450-beadchip[tiab] OR EPIC BeadChip[tiab] OR Infinium MethylationEPIC[tiab] OR methylome-wide[tiab] OR epigenome-wide[tiab] OR EWA stud\*[tiab] OR epigenom\*[tiab] OR epigene\*[tiab] OR methylat\*[tiab] OR DNAm[tiab] OR DNAmE[tiab] OR DNA-m[tiab] OR DNA-me[tiab] OR DMRs[tiab] OR differently-methylated[tiab] OR differential methylation[tiab] OR hypomethylation\*[tiab] OR hypermethylation\*[tiab] OR CPGs[tiab] OR CPG[tiab] OR CPGs[tiab] OR methylation-array[tiab] OR Methylome\*[tiab] OR genome-wide[tiab] OR genomewide[tiab] OR epigenomewide[tiab] OR GWAS[tiab] OR GWA stud\*[tiab] OR ExWAS[tiab]) AND ("Pregnancy"[Mesh] OR "Fetus"[Mesh] OR "Prenatal Exposure Delayed Effects"[Mesh] OR "Maternal Exposure"[Mesh] OR in utero[tiab] OR prenatal[tiab] OR pre-natal[tiab] OR foetal[tiab] OR foetus\*[tiab] OR fetal[tiab] OR fetus\*[tiab] OR maternal exposure\*[tiab] OR maternal serum[tiab] OR pregnancy exposure\*[tiab] OR exposure during pregnancy[tiab] OR exposures during pregnancy[tiab] OR developmental exposure\*[tiab] OR early life exposure\*[tiab] OR developmental origins of health[tiab] OR DOHaD[tiab]) AND ("Infant"[Mesh] OR infant\*[tiab] OR newborn\*[tiab] OR neonate\*[tiab] OR placenta\*[tiab] OR cord blood[tiab] OR dried blood spot\*[tiab] OR buccal[tiab])

## Web of Science All Databases

(TS=(EWAS OR 450k OR "450 K" OR HM450K OR HumanMethylation450\* OR Illumina450K OR 850k OR "850 K" OR HM850K OR HumanMethylation850\* OR Illumina OR 450-beadchip OR "EPIC BeadChip" OR MethylationEPIC OR methylome-wide OR epigenome-wide OR "EWA stud\*" OR epigenomewide) OR TI=(epigenom\* OR epigene\* OR methylat\* OR DNAm OR DNAmE OR DNA-m OR DNA-me OR DMRs OR differently-methylated OR "differential methylation" OR hypomethylat\* OR hypermethylat\* OR methylation-array OR Methylome\* OR genome-wide OR genomewide)) AND TS=((("in utero" OR prenatal OR pre-natal OR foetal OR foetus\* OR fetal OR fetus\* OR "maternal serum" OR ((pregnancy OR gestation\* OR developmental OR maternal) NEAR/2 (exposure\*)) OR "developmental origins of health" OR DOHaD OR mother-child OR mother-infant OR mother-offspring) AND (infant\* OR newborn\* OR neonat\* OR progeny OR offspring OR placenta\* OR "cord blood" OR "dried blood spot\*" OR "dried bloodspot\*" OR buccal)) AND TS=(particulate-matter OR smog OR soot OR PM2.5 OR "PM(2.5)" OR PM10 OR "PM(10)" OR carbon-black OR black-carbon OR elemental-carbon OR ((air OR airborne OR coarse OR ultrafine OR fine) NEAR/1 (particle\* OR particulate\*)) OR ((vehicle OR vehicles OR vehicular OR auto OR automobile OR motor\* OR bus OR buses OR car OR truck\* OR taxi OR taxis OR motorcycle\* OR engine\* OR traffic OR road\* OR street\* OR highway\* OR interstate\* OR transport\* OR factory OR factories OR industr\* OR manufactur\*) NEAR/2 (emission\* OR exhaust OR fume\*)) OR sulfur-dioxide OR SO2 OR ozone OR O3 OR hydrogen-sulfide OR H2S OR carbon-monoxide OR nitric-oxide OR nitrogen-oxide OR nitrogen-oxides OR nitrogen-dioxide OR NOx OR "NO(x)" OR NO2 OR volatile-organic-compound\* OR VOCs OR gasoline\* OR diesel OR petrol\* OR burn-pit\* OR ((wood OR firewood OR biomass\* OR charcoal OR fuel OR fuels OR gas OR gasoline OR kerosene OR dung OR manure) NEAR/2 (combust\* OR burn\* OR burning)) OR cooker\* OR cooking OR stove\* OR oven\* OR cookstove\* OR cook-stove\* OR woodstove\* OR heater\* OR fireplace\* OR woodsmoke OR dust OR radon OR allerg\* OR aeroallergen\* OR dander OR dustmite\* OR mite OR mites OR cockroach\* OR pollen OR housedust OR "dietary exposure\*" OR ((food OR "drinking water") NEAR/1 (contamination OR contaminant\*)) OR "food additive\*" OR selenium OR mycotoxin\* OR isoflavone\* OR isoflavonoid\* OR genistein OR phytoestrogen\* OR phytochemical\* OR "trace elements" OR micronutrient\* OR macronutrient\* OR nutrient\* OR fluoride OR calcium OR nutrition\* OR seafood OR PUFA OR PUFAs OR LCPUFA OR LCPUFAs OR "polyunsaturated fatty acids" OR "trans fat\*" OR "saturated fat\*" OR "monosaturated fat\*" OR mehg OR omega-3 OR omega-6 OR methanol OR "dietary sulfur" OR antioxidant\* OR vitamin\* OR multivitamin\* OR mineral\* OR "trace elements" OR flavinoids OR iodine OR riboflavin OR thiamine OR folate OR "folic acid" OR choline OR betaine OR Hydroxyvitamin-D OR sugar\* OR caffeine OR Zinc OR copper OR manganese OR iron OR Chromium OR biotin OR niacin OR "Pantothenic acid" OR dioxane\* OR dioxin\* OR furan OR furans OR dibenzofuran\* OR heptachlorodibenzodioxin OR HpCDD OR HCDD OR hexachlorodibenzodioxin OR HxCDD OR PeCDD OR dibenzodioxin\* OR PCDD OR Tetrachlorodibenzodioxin OR TCDD OR Heptachlorodibenzofuran OR Hexachlorodibenzofuran OR Octachlorodibenzofuran OR pentachlorodibenzofuran OR tetrachlorodibenzofuran OR TCDF OR (endocrine AND disrupt\*) OR bisphenol OR BPA OR dinitrophenol OR tetrabromobisphenol OR "2,2-bis(4-hydroxyphenyl)propane" OR 4-tert-octylphenol OR p-tert-octylphenol OR 4-tertiary-octylphenol OR "p-(1,1,3,3-tetramethylbutyl)-phenol" OR triclocarban OR trichlorocarbanilide OR trichlorocarban OR Triclosan OR butylparaben OR hydroxybenzoate OR ethylparaben OR methylparaben OR "polychlorinated biphenyl\*" OR PCB\* OR Tetrachlorobiphenyl OR pentachlorobiphenyl OR hexachlorobiphenyl OR Heptachlorobiphenyl OR trichlorobiphenyl OR Octachlorobiphenyl OR Nonachlorobiphenyl OR Decachlorobiphenyl OR diethylstilbestrol OR stilbestrol OR stilbene-estrogen OR xenoestrogen\* OR tributylin OR nonylphenol OR ethynylestradiol\* OR "electronic waste\*" OR "electronics waste\*" OR "electronic scrap\*" OR "Electronics recycling" OR e-scrap\* OR e-waste\* OR EWRs OR "Scrap computer\*" OR "waste electronic\*" OR WEEE OR ((electronic\* OR cell phone OR cellular phone OR mobile phone\* OR computer OR television\* OR "TV" OR "TVs" OR laptop\* OR tablet\* OR mobile-device\* OR MP3-player\* OR CD-player\* OR DVD-player\* OR sound-system OR home-entertainment\* OR camera\* OR game-console\* OR calculator\* OR circuit-board\* OR mother-board\* OR motherboard\* OR crt-funnel-glass OR liquid-crystal OR amoled OR LCD OR cathode-ray-tube\* OR battery OR batteries) AND (waste OR recycle\* OR disposal\* OR scrap OR scrapped OR scraps)) OR "fire retard\*" OR "flame retard\*" OR "fire proofing" OR ((halogenated OR chlorinated OR brominated OR polybrominated) NEAR/1 (diphenyl-ether\*)) OR PBDE\* OR PCDE\* OR BDE OR BDEs OR "tribrominated diphenyl ether" OR "tribromodiphenyl ether" OR "tetrabromodiphenyl ether" OR "brominated diphenyl ether" OR tetraBDE OR "tetrabrominated diphenyl ether" OR "pentabromodiphenyl ether" OR pentaBDE OR "hexabromodiphenyl ether" OR hexabromodiphenyl OR hexaBDE OR "heptabromodiphenyl ether" OR HeptaBDE OR hexabromocyclododecane OR HBCD OR 345-HBB OR 245-HBB OR PBB-153 OR PBB153 OR asbestos OR TDBPP OR "Environmental-agent\*" OR "environmental chemical\*" OR

“environmental compound\*” OR “environmental contaminant\*” OR “environmental determinant\*” OR “environmental estrogen\*” OR “environmental exposure\*” OR carcinogen\* OR teratogen\* OR mutagen\* OR epimutagen\* OR pollut\* OR cardiotox\* OR ecotox\* OR epitox\* OR toxicoepi\* OR toxicant\* OR toxin\* OR xenobiotic\* OR xenochemical\* OR “chemical exposure\*” OR “occupational exposure\*” OR “household exposure\*” OR “chemical mixture\*” OR “chemical product\*” OR “chemical hazard\*” OR “hazardous compound\*” OR “hazardous exposure\*” OR “hazardous mixture\*” OR “hazardous material\*” OR “hazardous product\*” OR “hazardous substance\*” OR “industrial compound\*” OR “industrial chemical\*” OR biohazard\* OR “personal product\*” OR cosmetics OR “cosmetic product\*” OR “care product\*” OR “consumer product\*” OR “commercial product\*” OR “cleaning product\*” OR “household product\*” OR “consumer goods” OR makeup OR make-up OR “hair product\*” OR “beauty product\*” OR toys OR “plastic container\*” OR “food container\*” OR “heavy metal\*” OR “toxic metal\*” OR “synthetic metal\*” OR arsenic OR arsenical\* OR arsenite\* OR arsenate\* OR ((Titanium OR Vanadium OR Chromium OR Manganese OR Iron OR Cobalt OR Nickel OR Copper OR Zinc OR Gallium OR Germanium OR Zirconium OR Niobium OR Molybdenum OR Technetium OR Ruthenium OR Rhodium OR Palladium OR Silver OR Cadmium OR Indium OR Tin OR Tellurium OR Lutetium OR Hafnium OR Tantalum OR Tungsten OR Rhenium OR Osmium OR Iridium OR Platinum OR Gold OR Mercury OR Methylmercury OR Thallium OR Bismuth OR Polonium OR Astatine OR Lanthanum OR Cerium OR Praseodymium OR Neodymium OR Promethium OR Samarium OR Europium OR Gadolinium OR Terbium OR Dysprosium OR Holmium OR Erbium OR Thulium OR Ytterbium OR Actinium OR Thorium OR Protactinium OR Uranium OR Neptunium OR Plutonium OR Americium OR Curium OR Berkelium OR Californium OR Einsteinium OR Fermium OR Nobelium OR Radium OR Lawrencium OR Rutherfordium OR Dubnium OR Seaborgium OR Bohrium OR Hassium OR Meitnerium OR Darmstadtium OR Roentgenium OR Copernicium) AND (poison\* OR exposure\* OR exposed OR contaminat\* OR dietary OR blood OR serum OR urine OR urinary)) OR “blood lead” OR (lead AND PB) OR “lead exposure\*” OR “dietary lead” OR “lead poisoning” OR “lead level\*” OR “polycyclic aromatic hydrocarbons” OR PAHs OR fumonisin OR benzopyrene OR benzo-a-pyrene OR "3,4-benzopyrene" OR hydroxypyrene OR benzene OR toluene OR xylene OR Pesticid\* OR fungicide\* OR herbicide\* OR insecticide\* OR insect-repellent\* OR rodenticide\* OR acaricide\* OR algicide\* OR biopesticide\* OR fumigant\* OR molluscicide\* OR nematocide\* OR weed-killer\* OR pest control OR organochlorin\* OR organic-chlorine OR chlorinated-hydrocarbon\* OR aldrin OR chlordan OR chlordane OR chlordecone OR chlorobenzene\* OR chlorofluorocarbon\* OR dichlorodiphenyltrichloroethane\* OR DDT OR Dichlorodiphenyldichloroethylene OR DDE OR dieldrin OR endrin OR heptachlor OR hexachlorobenzene OR hexachlorocyclohexane OR alpha-HCH OR beta-HCH OR lindane OR hexachlorocyclohexane OR methoxychlor OR mirex OR polychlorinated-biphenyl\* OR "polychlorinated biphenyls" OR polychlorobiphenyl OR PCBs OR tetrachloroethylene OR trichloroethane\* OR vinyl-chloride OR agent-orange OR Amitraz OR atrazine OR avermectin OR captan OR carbaryl OR carbofuran OR chlorfenvinphos OR chlorpyrifos OR coumaphos OR deet OR "N,N-diethyltoluamide" OR diazinon OR dichlorvos OR "dimethyl phthalate" OR endosulfan\* OR linalool OR malathion OR paraquat OR parathion OR pentachlorobenzene OR PeCB OR pentachlorophenol OR permethrin OR pyrethrin\* OR rotenone OR vinclozolin OR omethoate OR dichlorophenol OR “2,5-DCP” OR dichlorophenol OR “2,4-DCP” OR trichlorophenol OR “2,4,5-TCP” OR trichlorophenol OR “2,4,6-TCP” OR phthalate\* OR butylbenzenesulfonamide OR plasticizers OR MEOHP OR MEHP OR DEHP OR “Bis(2-ethylhexyl)phthalate” OR fluorocarbon\* OR “fluorinated organic compound\*” OR PFAS OR PFASs OR GenX OR Gen-X OR PFAA OR perfluoroalkyl OR polyfluoroalkyl OR perfluorinated OR PFCs OR PFC OR PFOS OR perfluorobutanesulfonic OR perfluorodecanoic OR perfluoro-n-decanoic OR nonadecafluoro-n-decanoic OR perfluorododecanoic OR PFDoA OR perfluoroheptanoic OR PFHpA OR perfluorohexanesulfonic OR PFHS OR perfluorohexanesulfonate OR “Perfluorohexane sulfonate” OR PFHxS OR “perfluorononanoic acid” OR “perfluorooctanoic acid” OR pentadecafluorooctanoic OR “perfluorooctanoyl chloride” OR PFOA OR “sodium perfluorooctanoate” OR perfluorooctanoate OR ammonium-perfluorooctanoate OR “APFO” OR “perfluorooctane sulfonic acid” OR “perfluorooctanesulfonic acid” OR PFOSA OR “perfluorooctanyl sulfonate” OR Perfluorooctanesulfonate OR “perfluorooctane-sulfonate” OR perfluorooctanesulfonamide OR perfluoroundecanoic OR solvents OR “organic solvent\*” OR "2-bromopropane" OR "2-propanol" OR acetone OR tetrachloroethylene OR toluene OR trichloroethylene OR "secondhand smoke" OR "second hand smoke" OR "passive smoke" OR cotinine OR nicotine OR smoking OR smoker\* OR cigarette\* OR tobacco OR cigar OR vaping OR “social stress\*” OR “financial stress\*” OR psychosocial OR socioeconomic OR “social determinant\*” OR “social factors” OR “sociological factors” OR disparities OR “minority health” OR discrimination OR discriminated OR discriminatory OR segregat\* OR prejudice\* OR racism OR racist OR sexism OR sexist OR ableism OR ableist OR homophob\* OR agist OR agism OR classism OR classist OR xenophobi\* OR Marginalize\* OR stigma OR stigmatize\* OR Microaggress\*

OR micro-aggress\* OR sedentary OR exercise\* OR screen-time OR "life choices" OR lifestyle\* OR life-style\* OR neighborhood\* OR neighbour\* OR "light pollut\*" OR "noise pollut\*" OR ALAN OR "light at night" OR greenspace\* OR "green space\*" OR "health equity" OR "health inequalities" OR "health inequality" OR "health justice" OR "health injustices" OR "vulnerable population\*" OR "sensitive population\*" OR "underserved population\*" OR "special population\*" OR indigent\* OR homeless\* OR squatter\* OR migrant\* OR "disaster victim\*" OR poverty\* OR deprived OR deprivation OR "working poor" OR disadvantage\* OR out-of-work OR jobless OR unemploy\* OR foreclosure OR foreclosed OR home-owner\* OR refugee\* OR displaced OR farmer\* OR agricultural-worker\* OR farm-hand\* OR laborer\* OR worker\* OR miner\* OR police\* OR military OR first responder\* OR firefighter\* OR occupational OR ethnic\* OR race OR races OR racial\* OR minorit\* OR nonwhite\* OR non-white\* OR "people of color" OR "person\* of color" OR "women of color" OR black\* OR african-american\* OR afro-american\* OR asian-american\* OR Chinese-american\* OR Korean-american\* OR Japanese-american\* OR filipino OR filipina OR arab-american\* OR native-hawaiian\* OR pacific-islander\* OR native-american\* OR american-indian\* OR alaska-native\* OR first people\* OR caribbean-american\* OR caribbean-islander\* OR Spanish-american\* OR hispanic\* OR latina\* OR latino\* OR latinx OR Mexican-american\* OR tejano OR meso-american\* OR mestizo OR puerto-rican\* OR Cuban\* OR acculturat\* OR Dominican\* OR criollo OR "adverse childhood" OR "adverse experience\*" OR adversity OR adversities OR abuse OR violence OR "traumatic childhood" OR "traumatic experience\*" OR "traumatic early life" OR "childhood trauma" OR "early life trauma" OR "violent childhood" OR "troubled childhood" OR "childhood maltreatment" OR "child maltreatment" OR "childhood mistreatment" OR "child mistreatment" OR "early life adverse" OR "early adverse life" OR "early life stress" OR "childhood neglect" OR "child neglect" OR "psychological trauma" OR "war expose\*" OR "war exposure\*" OR "war trauma" OR roadway\* OR highway\* OR ((hot OR cold OR extreme OR winter OR summer OR heat OR freezing OR high OR low) NEAR/1 (weather OR temperature\*)) OR "extreme heat" OR "extreme cold" OR "cold spell\*" OR "heat wave\*" OR heatwave\* OR "cold snap\*" OR "ambient temperature\*" OR "outdoor temperature\*" OR "air conditioning" OR "outdoor heat" OR "environmental temperature\*" OR meteorologic\* OR "heat stress" OR "cold stress" OR "cold exposure" OR "heat exposure" OR "severe weather" OR "extreme weather" OR disaster\* OR hurricane\* OR tornado\* OR tsunami\* OR typhoon\* OR earthquake\* OR wildfire\* OR "wild fire\*" OR flood OR flooding OR drought OR famine OR terrorism OR "terror attack\*" OR terrorist\* OR bombing OR "9/11" OR "twin towers" OR "nuclear accident\*") NOT (TI=("global methylation" OR "global DNA methylation" OR paternal OR sperm OR mice OR mouse OR rat OR rats) OR AB=(pyrosequenc\* OR 27K OR methylation27\* OR "candidate gene\*"))

## Embase

Limit to: Human studies

('environmental exposure'/exp OR 'environmental exposure' OR 'environmental chemical'/exp OR 'environmental chemical' OR 'environmental factor'/exp OR 'environmental factor' OR 'indoor environment'/exp OR 'indoor environment' OR 'work environment'/exp OR 'work environment' OR 'pollution'/exp OR 'pollution' OR 'environmental stress'/exp OR 'environmental stress' OR 'polycyclic aromatic hydrocarbon'/exp OR 'polycyclic aromatic hydrocarbon' OR 'PAHs' OR 'particulate matter' OR smog OR soot OR PM2.5 OR 'PM(2.5)' OR PM10 OR 'PM(10)' OR 'volatile organic compound\*' OR 'VOCs' OR 'pollutant'/exp OR 'pollutant\*' OR 'pollution' OR 'toxic substance'/exp OR 'toxic substance\*' OR 'toxicant\*' OR 'dangerous goods'/exp OR 'dangerous goods' OR 'radiation exposure'/exp OR 'radiation exposure' OR 'tobacco use'/exp OR 'smoking' OR 'tobacco' OR 'cotinine' OR 'nicotine' OR 'allergen'/exp OR 'allergen\*' OR 'body mass'/exp OR 'body mass' OR 'obesity'/exp OR 'obesity' OR 'obese' OR 'gestational weight gain'/exp OR 'gestational weight gain' OR 'overnutrition'/exp OR 'overnutrition' OR 'nutrition'/exp OR 'nutrition' OR 'vitamin'/exp OR 'vitamin\*' OR 'trace element'/exp OR 'trace element\*' OR 'dietary intake'/exp OR 'dietary intake\*' OR 'fluoride' OR 'calcium' OR 'nutrition\*' OR 'seafood' OR 'PUFA' OR 'PUFAs' OR 'LCPUFA' OR 'LCPUFAs' OR 'polyunsaturated fatty acids' OR 'trans fat\*' OR 'saturated fat\*' OR 'monosaturated fat\*' OR 'mehg' OR 'omega-3' OR 'omega-6' OR 'dietary sulfur' OR 'antioxidant\*' OR 'vitamin\*' OR 'multivitamin\*' OR 'trace elements' OR 'flavinoids' OR 'iodine' OR 'riboflavin' OR 'thiamine' OR 'folate' OR 'folic acid' OR 'choline' OR 'betaine' OR 'Hydroxyvitamin-D' OR 'sugar\*' OR 'caffeine' OR 'dioxin'/exp OR 'dioxin\*' OR 'furan'/exp OR 'furan\*' OR 'endocrine disruptor'/exp OR 'endocrine disruptor' OR '4,4` isopropylidenediphenol'/exp OR '4,4` isopropylidenediphenol' OR 'phenol derivative'/exp OR 'phenol derivative' OR 'organochlorine derivative'/exp OR 'organochlorine' OR 'triclosan'/exp OR 'triclosan' OR 'organic solvent'/exp OR 'organic solvent\*' OR 'diethylstilbestrol derivative'/exp OR 'diethylstilbestrol' OR 'xenoestrogen'/exp OR 'xenoestrogen\*' OR 'flame retardant'/exp OR 'flame retardant\*' OR 'fire retardant\*' OR (('halogenated' OR 'chlorinated' OR 'brominated' OR 'polybrominated')) NEAR/1



('diphenyl-ether\*')) OR 'PBDE\*' OR 'PCDE\*' OR 'BDE' OR 'BDEs' OR 'tribrominated diphenyl ether' OR 'tribromodiphenyl ether' OR 'tetrabromodiphenyl ether' OR 'brominated diphenyl ether' OR 'tetraBDE' OR 'tetrabrominated diphenyl ether' OR 'pentabromodiphenyl ether' OR pentaBDE OR 'hexabromodiphenyl ether' OR 'hexabromodiphenyl' OR 'hexaBDE' OR 'heptabromodiphenyl ether' OR 'HeptaBDE' OR 'hexabromocyclododecane' OR 'HBCD' OR 'asbestos' OR 'TDBPP' OR 'Pesticide\*' OR 'aldrin' OR 'chlordan' OR 'chlordan' OR 'chlordecone' OR 'chlorobenzene\*' OR 'chlorofluorocarbon\*' OR 'dichlorodiphenyltrichloroethane\*' OR 'DDT' OR 'Dichlorodiphenyldichloroethylene' OR 'DDE' OR 'dieldrin' OR 'endrin' OR 'heptachlor' OR 'hexachlorobenzene' OR 'hexachlorocyclohexane' OR 'alpha-HCH' OR 'beta-HCH' OR 'lindane' OR 'hexachlorocyclohexane' OR 'methoxychlor' OR 'mirex' OR 'tetrachloroethylene' OR 'trichloroethane\*' OR 'vinyl-chloride' OR 'Amitraz' OR 'atrazine' OR 'ivermectin' OR 'captan' OR 'carbaryl' OR 'carbofuran' OR 'chlorfenvinphos' OR 'chlorpyrifos' OR 'coumaphos' OR 'deet' OR 'N,N-diethyltoluamide' OR 'diazinon' OR 'dichlorvos' OR 'dimethyl phthalate' OR 'endosulfan\*' OR 'linalool' OR 'malathion' OR 'paraquat' OR 'parathion' OR 'pentachlorobenzene' OR 'PeCB' OR 'pentachlorophenol' OR 'permethrin' OR 'pyrethrin\*' OR 'rotenone' OR 'vinclozolin' OR 'omethoate' OR 'dichlorophenol' OR 'benzene derivative'/exp OR 'plasticizers' OR 'phthalates' OR 'cosmetic'/exp OR 'cosmetics' OR 'personal care product'/exp OR 'care product\*' OR 'heavy metal'/exp OR 'heavy metal\*' OR 'heavy metal poisoning'/exp OR 'heavy metal poisoning' OR 'lead poisoning' OR 'mercury' OR 'arsenic' OR 'arsenical\*' OR 'arsenite\*' OR 'arsenate\*' OR 'methylmercury' OR 'cadmium' OR 'chromium' OR 'manganese' OR 'zinc' OR 'iron' OR 'heavy metal pollution'/exp OR 'heavy metal pollution' OR 'xylene'/exp OR 'xylene' OR 'benzene'/exp OR 'benzene\*' OR 'psychosocial stress\*' OR 'social problem'/exp OR 'social problem\*' OR 'social aspects and related phenomena'/exp OR 'social stress\*' OR 'social determinant\*' OR 'minority group'/exp OR 'minority group\*' OR 'lifestyle and related phenomena'/exp OR 'lifestyle\*' OR 'sleep'/exp OR 'sleep\*' OR 'insomnia'/exp OR 'insomnia' OR 'social environment'/exp OR 'social environment' OR psychosocial OR socioeconomic OR 'social determinant\*' OR 'social factors' OR 'sociological factors' OR 'minority health' OR discrimination OR discriminated OR discriminatory OR segregat\* OR prejudice\* OR racism OR racist OR sexism OR sexist OR ableism OR ableist OR homophob\* OR agist OR agism OR classism OR classist OR xenophobi\* OR Marginalize\* OR stigma OR stigmatize\* OR Microaggress\* OR micro-aggress\* OR sedentary OR exercise\* OR screen-time OR 'life choices' OR lifestyle\* OR life-style\* OR neighborhood\* OR neighbourhoood\* OR 'light pollut\*' OR 'noise pollut\*' OR ALAN OR 'light at night' OR greenspace\* OR 'green space\*' OR 'health equity' OR 'health inequalities' OR 'health inequality' OR 'health justice' OR 'health injustices' OR 'vulnerable population\*' OR 'sensitive population\*' OR 'underserved population\*' OR 'special population\*' OR indigent\* OR homeless\* OR squatter\* OR migrant\* OR 'disaster victim\*' OR poverty\* OR deprived OR deprivation OR 'working poor' OR disadvantage\* OR out-of-work OR jobless OR unemploy\* OR foreclosure OR foreclosed OR home-owner\* OR refugee\* OR displaced OR farmer\* OR agricultural-worker\* OR farm-hand\* OR laborer\* OR worker\* OR miner\* OR police\* OR military OR first responder\* OR firefighter\* OR occupational OR ethnic\* OR race OR races OR racial\* OR minorit\* OR nonwhite\* OR non-white\* OR 'people of color' OR 'person\* of color' OR 'women of color' OR black\* OR african-american\* OR afro-american\* OR asian-american\* OR Chinese-american\* OR Korean-american\* OR Japanese-american\* OR filipino OR filipina OR arab-american\* OR native-hawaiian\* OR pacific-islander\* OR native-american\* OR american-indian\* OR alaska-native\* OR first people\* OR caribbean-american\* OR caribbean-islander\* OR Spanish-american\* OR hispanic\* OR latina\* OR latino\* OR latinx OR Mexican-american\* OR tejano OR meso-american\* OR mestizo OR puerto-rican\* OR Cuban\* OR acculturat\* OR Dominican\* OR criollo OR 'adverse childhood' OR 'adverse experience\*' OR adversity OR adversities OR abuse OR violence OR 'traumatic childhood' OR 'traumatic experience\*' OR 'traumatic early life' OR 'childhood trauma' OR 'early life trauma' OR 'violent childhood' OR 'troubled childhood' OR 'childhood maltreatment' OR 'child maltreatment' OR 'childhood mistreatment' OR 'child mistreatment' OR 'early life adverse' OR 'early adverse life' OR 'early life stress' OR 'childhood neglect' OR 'child neglect' OR 'psychological trauma' OR 'war expose\*' OR 'war exposure\*' OR 'war trauma' OR 'meteorological phenomena'/exp OR 'meteorological phenomena' OR 'heat wave\*' OR 'heatwave\*' OR 'severe weather' OR 'disaster\*' OR 'ambient temperature\*' OR 'outdoor temperature\*' OR 'air conditioning' OR 'outdoor heat' OR 'environmental temperature\*' OR 'occupational exposure'/exp OR 'occupational exposure\*' OR 'military phenomena'/exp OR 'military' OR 'perfluoroalkanoic acid'/exp OR 'perfluoroalkanoic acid' OR 'fluorocarbon'/exp OR 'fluorocarbon' OR 'fluorocarbon\*' OR 'fluorinated organic compound\*' OR 'PFAS\*' OR 'GenX' OR 'Gen-X' OR 'PFAA' OR 'perfluoroalkyl' OR 'polyfluoroalkyl' OR 'perfluorinated' OR 'PFCs' OR 'PFC' OR 'PFOS' OR 'perfluorobutanesulfonic' OR 'perfluorodecanoic' OR 'perfluoro-n-decanoic' OR 'nonadecafluoro-n-decanoic' OR 'perfluorododecanoic' OR 'PFD<sub>o</sub>A' OR 'perfluoroheptanoic' OR 'PFHpA' OR 'perfluorohexanesulfonic' OR 'PFHS' OR 'perfluorohexanesulfonate' OR 'Perfluorohexane sulfonate' OR 'PFHxS' OR 'perfluorononanoic

acid' OR 'perfluorooctanoic acid' OR 'pentadecafluorooctanoic' OR 'perfluorooctanoyl chloride' OR 'PFOA' OR 'sodium perfluorooctanoate' OR 'perfluorooctanoate' OR 'ammonium perfluorooctanoate' OR 'APFO' OR 'perfluorooctane sulfonic acid' OR 'perfluorooctanesulfonic acid' OR 'PFOSA' OR 'perfluorooctanyl sulfonate' OR 'Perfluorooctanesulfonate' OR 'perfluorooctane-sulfonate' OR 'perfluorooctanesulfonamide' OR 'perfluoroundecanoic') AND ('prenatal exposure'/exp OR 'prenatal exposure' OR 'maternal exposure'/exp OR 'maternal exposure' OR 'pregnancy'/exp OR 'pregnancy') AND ('newborn'/exp OR 'newborn' OR 'infant'/exp OR 'infant' OR 'blood spot\*' OR 'bloodspot\*' OR 'placenta'/exp OR placenta OR placental OR buccal OR 'cord blood'/exp OR 'cord blood') AND ('epigenome wide association study'/exp OR 'epigenome wide association study' OR 'epigenetics'/exp OR 'epigenetics' OR 'epigen\*':ti OR 'epigenome'/exp OR 'epigenome' OR 'dna methylation'/exp OR 'dna methylation' OR 'dna methylation':ti OR ewas OR hm450\* OR methylation450\* OR 450k OR '450 k' OR hm850\* OR methylation850\* OR 850k OR '850 k' OR 'epic beadchip' OR (methylation NEAR/1 epic)) NOT (pyrosequenc\* OR 27k OR methylation27\*)

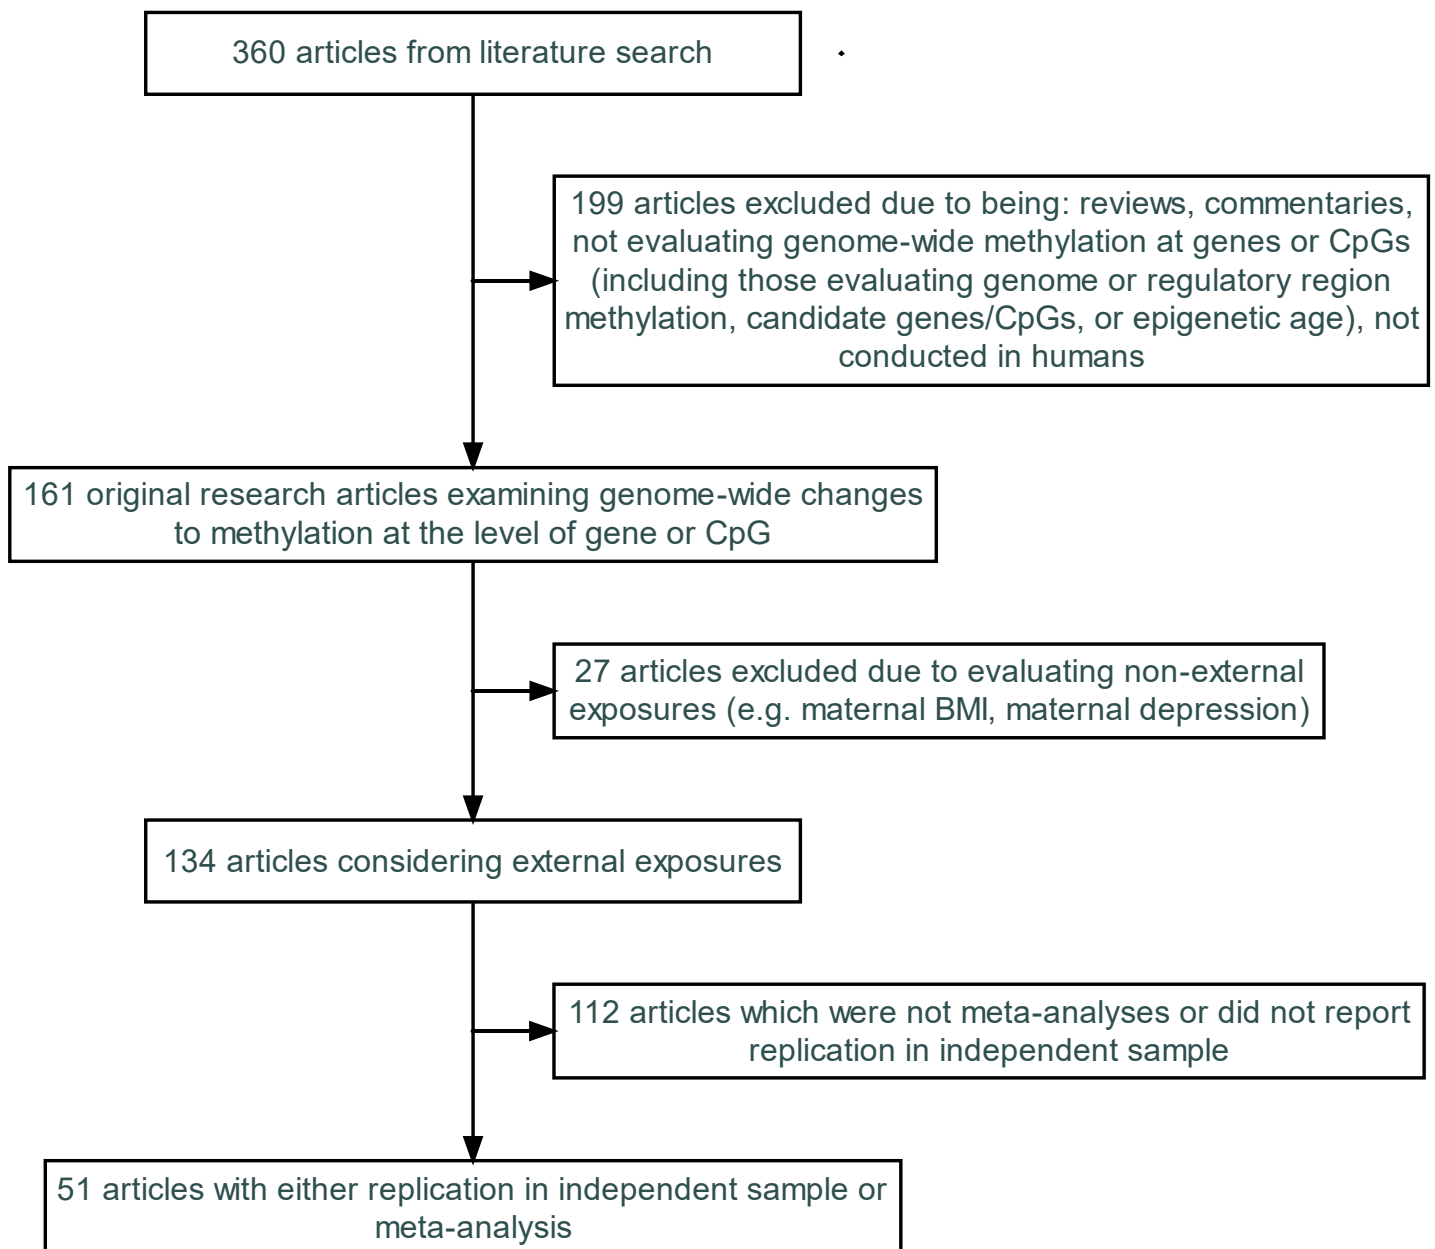

**Figure S1:** Inclusion and exclusion of studies for consideration in systemic review. Using the search terms described in the Supplementary Methods, we conducted a systemic review of epigenome-wide association studies. We excluded studies which were not epigenome-wide association studies ( $n=199$ ) and studies which evaluated non-external exposures ( $n=27$ ). We review in depth only studies that either performed replication in an independent sample or conducted a meta-analysis. We retained only EWAS of external exposures ( $n=134$ ), excluding studies with only global or candidate methylation positions or examining non-exogenous exposures. We included studies using array or sequencing-based methods to measure methylation; 128 of the 134 exogenous exposure EWAS used the Illumina450K or EPIC arrays.

Table S1: Summary statistics on sample sizes of epigenome wide association studies

| Exposure category | M (N)*  | min | lower whisker <sup>1</sup> | Q25 <sup>2</sup> | median | Q75 <sup>2</sup> | upper whisker <sup>1</sup> | max  |
|-------------------|---------|-----|----------------------------|------------------|--------|------------------|----------------------------|------|
| Stress            | 8 (8)   | 24  | 24                         | 193              | 373    | 492              | 691                        | 973  |
| Other chemical    | 26 (28) | 16  | 16                         | 71               | 162    | 263              | 408                        | 1033 |
| Metal             | 36 (49) | 17  | 17                         | 61               | 202    | 361              | 484                        | 1462 |
| Air pollution     | 12 (14) | 22  | 22                         | 191              | 428    | 1093             | 1949                       | 1949 |
| Other             | 4 (4)   | 96  | 96                         | 96               | 557    | 1424             | 2644                       | 2644 |
| Diet              | 29 (38) | 13  | 13                         | 70               | 176    | 378              | 709                        | 2802 |
| Alcohol           | 3 (3)   | 149 | 149                        | 584              | 1018   | 2046             | 3075                       | 3075 |
| Smoking           | 19 (19) | 20  | 20                         | 213              | 568    | 1084             | 1700                       | 6685 |

\*M = number of sample size data points included N = number of unique studies. M and N are not always the same as some epigenome wide association study publications had >1 exposure included and different sample sizes for each exposure.

<sup>1</sup>Lower whisker is the smallest sample size that is greater than or equal to the 25% – 1.5\*interquartile range. Upper whisker is the largest sample size that is less than or equal to the 75% + 1.5\*interquartile range.

<sup>2</sup>25% and 75% respectively

Table S2: Complete data used to create Figure 2 from 134 epigenome wide association studies of external exposures. Please note not all rows included as data points in all facets of Figure 2, Figure 2 footnote explains exclusions.

| DOI                                                                                                     | Study Type                      | Significance criteria | Epigenetic measurement | Ancestry                   | Exposure                  | Exposure category | Sample size | Significant DMPs |
|---------------------------------------------------------------------------------------------------------|---------------------------------|-----------------------|------------------------|----------------------------|---------------------------|-------------------|-------------|------------------|
| <a href="https://doi.org/10.1093/aje/kwz184">https://doi.org/10.1093/aje/kwz184</a>                     | No replication or meta-analysis | Bonferroni            | EPIC                   | European                   | Prenatal maternal smoking | Smoking           | 441         | 71               |
| <a href="https://doi.org/10.4161/15592294.2014.971593">https://doi.org/10.4161/15592294.2014.971593</a> | No replication or meta-analysis | FDR<0.05              | 450K                   | Not described              | Prenatal maternal smoking | Smoking           | 85          | 0                |
| <a href="https://doi.org/10.1038/s41467-021-24558-y">10.1038/s41467-021-24558-y</a>                     | Meta-analysis                   | Bonferroni            | 450K                   | multi - primarily European | Maternal smoking          | Smoking           | 1700        | 443              |
| <a href="https://doi.org/10.1098/rstb.2018.0120">https://doi.org/10.1098/rstb.2018.0120</a>             | Meta-analysis                   | Bonferroni            | 450K                   | European                   | Prenatal maternal smoking | Smoking           | 1263        | 110              |
| <a href="https://doi.org/10.1289/ehp3398">https://doi.org/10.1289/ehp3398</a>                           | Replication                     | FDR<0.05              | WGBS                   | European                   | Maternal prenatal smoking | Smoking           | 20          | 10381            |
| <a href="https://doi.org/10.1186/s12967-015-0384-5">https://doi.org/10.1186/s12967-015-0384-5</a>       | No replication or meta-analysis | FDR<0.05              | 450K                   | European                   | Maternal prenatal smoking | Smoking           | 20          | 31               |
| <a href="https://doi.org/10.1289/ehp.1205412">https://doi.org/10.1289/ehp.1205412</a>                   | Replication                     | Bonferroni            | 450K                   | multi - primarily European | Maternal prenatal smoking | Smoking           | 1062        | 26               |
| <a href="https://doi.org/10.1016/j.ajhg.2016.02.019">https://doi.org/10.1016/j.ajhg.2016.02.019</a>     | Meta-analysis                   | Bonferroni            | 450K                   | multi - primarily European | Maternal prenatal smoking | Smoking           | 6685        | 6073             |
| <a href="https://doi.org/10.1093/ije/dyv048">https://doi.org/10.1093/ije/dyv048</a>                     | Meta-analysis                   | FDR<0.05              | 450K                   | European                   | Maternal prenatal smoking | Smoking           | 255         | 35               |
| <a href="https://doi.org/10.1289/ehp.1307892">https://doi.org/10.1289/ehp.1307892</a>                   | Replication                     | FDR<0.05              | 450K                   | European                   | Prenatal maternal smoking | Smoking           | 889         | 185              |
| <a href="https://doi.org/10.1038/s41598-018-23772-x">https://doi.org/10.1038/s41598-018-23772-x</a>     | No replication or meta-analysis | FDR<0.05              | 450K                   | Asian                      | Maternal smoking          | Smoking           | 247         | 121              |
| <a href="https://doi.org/10.1093/ije/dyw196">https://doi.org/10.1093/ije/dyw196</a>                     | Replication                     | FDR<0.05              | 450K                   | European                   | maternal prenatal smoking | Smoking           | 179         | 50               |
| <a href="https://doi.org/10.1186/s12864-016-3310-1">https://doi.org/10.1186/s12864-016-3310-1</a>       | Replication                     | Bonferroni            | 450K                   | European                   | prenatal maternal smoking | Smoking           | 1062        | 27               |
| <a href="https://doi.org/10.1186/s12916-020-01736-1">https://doi.org/10.1186/s12916-020-01736-1</a>     | No replication or meta-analysis | FDR<0.05              | 450K                   | multi - primarily European | prenatal maternal smoking | Smoking           | 568         | 242              |

|                                                                                                           |                                 |                        |      |                            |                                         |         |      |      |
|-----------------------------------------------------------------------------------------------------------|---------------------------------|------------------------|------|----------------------------|-----------------------------------------|---------|------|------|
| <a href="https://doi.org/10.1186/s13148-021-01161-y">https://doi.org/10.1186/s13148-021-01161-y</a>       | Replication                     | FDR<0.05               | EPIC | multi - primarily European | smoking                                 | Smoking | 59   | 726  |
| <a href="https://doi.org/10.2217/epi-2019-0066">https://doi.org/10.2217/epi-2019-0066</a>                 | Meta-analysis                   | FDR<0.05               | 450K | multi - primarily European | prenatal maternal smoking               | Smoking | 5648 | 5547 |
| <a href="https://doi.org/10.1186/s12916-020-01686-8">https://doi.org/10.1186/s12916-020-01686-8</a>       | Replication                     | FDR<0.05               | 450K | multi - primarily European | Maternal prenatal smoking               | Smoking | 1105 | 41   |
| <a href="https://doi.org/10.1186/s13148-021-01032-6">https://doi.org/10.1186/s13148-021-01032-6</a>       | No replication or meta-analysis | FDR<0.05               | EPIC | multi                      | prenatal maternal smoking               | Smoking | 954  | 38   |
| <a href="https://doi.org/10.1080/15592294.2018.1475978">https://doi.org/10.1080/15592294.2018.1475978</a> | No replication or meta-analysis | FDR<0.05               | 450K | African                    | Maternal prenatal smoking               | Smoking | 379  | 12   |
| <a href="https://doi.org/10.2217/epi-2021-0285">https://doi.org/10.2217/epi-2021-0285</a>                 | No replication or meta-analysis | FDR<0.05               | 450K | multi - primarily European | prenatal alcohol exposure               | Alcohol | 149  | 0    |
| <a href="https://doi.org/10.2217/epi-2017-0095">https://doi.org/10.2217/epi-2017-0095</a>                 | Meta-analysis                   | FDR<0.05               | 450K | multi - primarily European | maternal alcohol                        | Alcohol | 3075 | 0    |
| <a href="https://doi.org/10.1002/ijc.32203">https://doi.org/10.1002/ijc.32203</a>                         | No replication or meta-analysis | FDR<0.05               | 450K | European                   | alcohol                                 | Alcohol | 1018 | 192  |
| <a href="https://doi.org/10.4161/15592294.2014.983366">https://doi.org/10.4161/15592294.2014.983366</a>   | No replication or meta-analysis | FDR<0.05               | 450K | European                   | n-3 PUFA                                | Diet    | 70   | 0    |
| <a href="https://doi.org/10.1096/fj.13-249029">https://doi.org/10.1096/fj.13-249029</a>                   | Replication                     |                        | 450K | European                   | folate                                  | Diet    | 23   | N/A  |
| <a href="https://doi.org/10.1089/bfm.2017.0231">https://doi.org/10.1089/bfm.2017.0231</a>                 | No replication or meta-analysis | p<0.05 (no correction) | 450K | multi - primarily European | Vitamin D                               | Diet    | 13   | 0    |
| <a href="https://doi.org/10.3390/ijerph17249190">https://doi.org/10.3390/ijerph17249190</a>               | No replication or meta-analysis | Bonferroni             | 450K | multi - primarily European | Prenatal vitamin                        | Diet    | 130  | 0    |
| <a href="https://doi.org/10.3389/fgene.2019.01050">https://doi.org/10.3389/fgene.2019.01050</a>           | No replication or meta-analysis | p<0.05 (no correction) | 450K | European                   | n-3 PUFAS (polyunsaturated fatty acids) | Diet    | 118  | 0    |
| <a href="https://doi.org/10.1093/hmg/ddx164">https://doi.org/10.1093/hmg/ddx164</a>                       | Replication                     | FDR<0.05               | 450K | European                   | B12                                     | Diet    | 641  | 3    |
| <a href="https://doi.org/10.3390/nu10040455">https://doi.org/10.3390/nu10040455</a>                       | Replication                     | FDR<0.05               | EPIC | European                   | Low glycemic index dietary intervention | Diet    | 60   | 0    |

|                                                                                                           |                                 |                                 |             |                            |                                                                                    |      |      |      |
|-----------------------------------------------------------------------------------------------------------|---------------------------------|---------------------------------|-------------|----------------------------|------------------------------------------------------------------------------------|------|------|------|
| <a href="https://doi.org/10.1080/15592294.2015.1117889">https://doi.org/10.1080/15592294.2015.1117889</a> | Replication                     | Permutation-based P values test | 450K        | multi - primarily European | Folate                                                                             | Diet | 343  | 4    |
| <a href="https://doi.org/10.3390/nu12113309">https://doi.org/10.3390/nu12113309</a>                       | No replication or meta-analysis | FDR<0.05                        | 450K        | multi - primarily European | breastfeeding                                                                      | Diet | 709  | 1    |
| <a href="https://doi.org/10.1186/s13148-021-01115-4">https://doi.org/10.1186/s13148-021-01115-4</a>       | No replication or meta-analysis | FDR<0.10                        | EPIC        | European                   | <i>Lactobacillus reuteri</i> only vs placebo                                       | Diet | 63   | 1246 |
| <a href="https://doi.org/10.1186/s13148-021-01115-4">https://doi.org/10.1186/s13148-021-01115-4</a>       | No replication or meta-analysis | FDR<0.10                        | EPIC        | European                   | $\omega$ -3 fatty acid supplementation vs placebo                                  | Diet | 63   | 984  |
| <a href="https://doi.org/10.1186/s13148-021-01115-4">https://doi.org/10.1186/s13148-021-01115-4</a>       | No replication or meta-analysis | FDR<0.10                        | EPIC        | European                   | <i>Lactobacillus reuteri</i> and $\omega$ -3 fatty acid supplementation vs placebo | Diet | 63   | 1659 |
| <a href="https://doi.org/10.1038/ncomms10577">https://doi.org/10.1038/ncomms10577</a>                     | Meta-analysis                   | Bonferroni                      | 450K        | European                   | Folate                                                                             | Diet | 1988 | 48   |
| <a href="https://doi.org/10.1038/s41598-018-35111-1">https://doi.org/10.1038/s41598-018-35111-1</a>       | No replication or meta-analysis | FDR<0.05                        | 450K        | multi                      | One carbon                                                                         | Diet | 24   | 1    |
| <a href="https://doi.org/10.1080/15592294.2022.2038412">https://doi.org/10.1080/15592294.2022.2038412</a> | Meta-analysis                   | FDR<0.05                        | 450K        | multi - primarily European | Mediterranean diet                                                                 | Diet | 2802 | 1    |
| <a href="https://doi.org/10.1080/15592294.2021.1957575">https://doi.org/10.1080/15592294.2021.1957575</a> | No replication or meta-analysis | Bonferroni                      | 450K        | European                   | maternal diet pattern                                                              | Diet | 557  | 0    |
| <a href="https://doi.org/10.3390/nu13010099">https://doi.org/10.3390/nu13010099</a>                       | No replication or meta-analysis | FDR<0.05                        | 450K & EPIC | European                   | Breastfeeding                                                                      | Diet | 201  | 87   |
| <a href="https://doi.org/10.1016/j.jnutbio.2022.108938">https://doi.org/10.1016/j.jnutbio.2022.108938</a> | No replication or meta-analysis | FDR<0.05                        | EPIC        | multi - primarily European | one-carbon metabolites - maternal trimester 3 SAH                                  | Diet | 89   | 272  |
| <a href="https://doi.org/10.1016/j.jnutbio.2022.108938">https://doi.org/10.1016/j.jnutbio.2022.108938</a> | No replication or meta-analysis | FDR<0.05                        | EPIC        | multi - primarily European | one-carbon metabolites - cord blood SAH                                            | Diet | 89   | 81   |
| <a href="https://doi.org/10.1016/j.jnutbio.2022.108938">https://doi.org/10.1016/j.jnutbio.2022.108938</a> | No replication or meta-analysis | FDR<0.05                        | EPIC        | multi - primarily European | one-carbon metabolites - cord blood betaine                                        | Diet | 89   | 2    |
| <a href="https://doi.org/10.1016/j.jnutbio.2022.108938">https://doi.org/10.1016/j.jnutbio.2022.108938</a> | No replication or meta-analysis | FDR<0.05                        | EPIC        | multi - primarily European | one-carbon metabolites - cord blood methionine                                     | Diet | 89   | 1    |

|                                                                                                       |                                 |            |      |                                  |                                                           |      |      |    |
|-------------------------------------------------------------------------------------------------------|---------------------------------|------------|------|----------------------------------|-----------------------------------------------------------|------|------|----|
| <a href="https://doi.org/10.1093/ajcn/nqab348">https://doi.org/10.1093/ajcn/nqab348</a>               | No replication or meta-analysis | FDR<0.05   | EPIC | European                         | caffeine metabolites - caffeine                           | Diet | 378  | 0  |
| <a href="https://doi.org/10.1093/ajcn/nqab348">https://doi.org/10.1093/ajcn/nqab348</a>               | No replication or meta-analysis | FDR<0.05   | EPIC | European                         | caffeine metabolites - theobromine                        | Diet | 378  | 1  |
| <a href="https://doi.org/10.1093/ajcn/nqab348">https://doi.org/10.1093/ajcn/nqab348</a>               | No replication or meta-analysis | FDR<0.05   | EPIC | European                         | caffeine metabolites - preconception self-report caffeine | Diet | 378  | 1  |
| <a href="https://doi.org/10.1186/s13148-022-01276-w">https://doi.org/10.1186/s13148-022-01276-w</a>   | Meta-analysis                   | FDR<0.05   | 450K | European                         | Iron                                                      | Diet | 1286 | 3  |
| <a href="https://doi.org/10.1093/ajcn/nqz311">https://doi.org/10.1093/ajcn/nqz311</a>                 | No replication or meta-analysis | FDR<0.05   | EPIC | European                         | maternal fatty acids - PUFA                               | Diet | 374  | 6  |
| <a href="https://doi.org/10.1093/ajcn/nqz311">https://doi.org/10.1093/ajcn/nqz311</a>                 | No replication or meta-analysis | FDR<0.05   | EPIC | European                         | maternal fatty acids - SFA                                | Diet | 374  | 4  |
| <a href="https://doi.org/10.1093/ajcn/nqz311">https://doi.org/10.1093/ajcn/nqz311</a>                 | No replication or meta-analysis | FDR<0.05   | EPIC | European                         | maternal fatty acids - trans FA                           | Diet | 374  | 7  |
| <a href="https://doi.org/10.3390/ijerph17103569">https://doi.org/10.3390/ijerph17103569</a>           | No replication or meta-analysis | FDR<0.05   | EPIC | European                         | breastfeeding                                             | Diet | 181  | 2  |
| <a href="https://doi.org/10.1186/s13148-021-01161-y">https://doi.org/10.1186/s13148-021-01161-y</a>   | No replication or meta-analysis | FDR<0.05   | EPIC | multi - primarily European       | vitamin C supplementation in smokers                      | Diet | 72   | 1  |
| <a href="https://doi.org/10.1038/s41598-018-27391-4">https://doi.org/10.1038/s41598-018-27391-4</a>   | Replication                     | Bonferroni | 450K | European                         | Iron supplement                                           | Diet | 1062 | 0  |
| <a href="https://doi.org/10.1016/j.jsbmb.2016.03.005">https://doi.org/10.1016/j.jsbmb.2016.03.005</a> | Meta-analysis                   | FDR<0.05   | 450K | European                         | 25-hydroxyvitamin D                                       | Diet | 1416 | 0  |
| <a href="https://doi.org/10.1002/ijc.32203">https://doi.org/10.1002/ijc.32203</a>                     | No replication or meta-analysis | FDR<0.05   | 450K | European                         | caffeine                                                  | Diet | 1018 | 66 |
| <a href="https://doi.org/10.1093/eep/dvz004">https://doi.org/10.1093/eep/dvz004</a>                   | No replication or meta-analysis | FDR<0.05   | 450K | Admixed/Latino                   | maternal lipid metabolites                                | Diet | 81   | 6  |
| <a href="https://doi.org/10.1002/dev.22088">https://doi.org/10.1002/dev.22088</a>                     | No replication or meta-analysis | FDR<0.05   | 450K | multi - primarily Admixed/Latino | maternal sugar intake                                     | Diet | 170  | 0  |
| <a href="https://doi.org/10.1186/s13148-016-0281-7">https://doi.org/10.1186/s13148-016-0281-7</a>     | No replication or meta-analysis | FDR<0.05   | 450K | European                         | DHA fish oil                                              | Diet | 369  | 1  |



|                                                                                                         |                                 |           |      |                            |                                              |               |      |      |
|---------------------------------------------------------------------------------------------------------|---------------------------------|-----------|------|----------------------------|----------------------------------------------|---------------|------|------|
| <a href="https://doi.org/10.1186/s12263-019-0634-x">https://doi.org/10.1186/s12263-019-0634-x</a>       | Replication                     | FDR<0.05  | 450K | Asian                      | maternal glycemic index dietary intervention | Diet          | 24   | 365  |
| <a href="https://doi.org/10.1016/j.envres.2021.112186">https://doi.org/10.1016/j.envres.2021.112186</a> | No replication or meta-analysis | p<0.0001  | EPIC | Asian                      | long-chain n-3 polyunsaturated fatty acids   | Diet          | 40   | 20   |
| <a href="https://doi.org/10.1093/humrep/deab137">https://doi.org/10.1093/humrep/deab137</a>             | Meta-analysis                   | FDR<0.05  | 450K | European                   | medically assisted reproduction              | Other         | 2644 | 5    |
| <a href="https://doi.org/10.1038/s41435-021-00151-7">https://doi.org/10.1038/s41435-021-00151-7</a>     | No replication or meta-analysis | FDR<0.05  | EPIC | Not described              | pet ownership                                | Other         | 96   | 113  |
| <a href="https://doi.org/10.1016/j.ygeno.2021.03.006">https://doi.org/10.1016/j.ygeno.2021.03.006</a>   | No replication or meta-analysis | FDR<0.05  | EPIC | European                   | opioid exposure                              | Other         | 96   | 1125 |
| <a href="https://doi.org/10.1002/ijc.32203">https://doi.org/10.1002/ijc.32203</a>                       | No replication or meta-analysis | FDR<0.05  | 450K | European                   | radiation                                    | Other         | 1018 | 288  |
| <a href="https://doi.org/10.1016/j.envint.2018.05.007">https://doi.org/10.1016/j.envint.2018.05.007</a> | No replication or meta-analysis | FDR<0.05  | 450K | European                   | NO2; PM10; temperature; humidity             | Air pollution | 668  | 6    |
| <a href="https://doi.org/10.1093/eep/dvw005">https://doi.org/10.1093/eep/dvw005</a>                     | Replication                     | FDR<0.15  | 450K | multi - primarily European | Air pollution PM                             | Air pollution | 240  | 31   |
| <a href="https://doi.org/10.1039/c6em00074f">https://doi.org/10.1039/c6em00074f</a>                     | No replication or meta-analysis | FDR<0.10  | 450K | African                    | HIV and air pollution                        | Air pollution | 22   | 0    |
| <a href="https://doi.org/10.1289/ehp36">https://doi.org/10.1289/ehp36</a>                               | Meta-analysis                   | FDR<0.05  | 450K | multi - primarily European | NO2                                          | Air pollution | 1508 | 3    |
| <a href="https://doi.org/10.1289/ehp4522">https://doi.org/10.1289/ehp4522</a>                           | Meta-analysis                   | FDR<0.05  | 450K | multi - primarily European | PM10                                         | Air pollution | 1949 | 6    |
| <a href="https://doi.org/10.1289/ehp4522">https://doi.org/10.1289/ehp4522</a>                           | Meta-analysis                   | FDR<0.05  | 450K | multi - primarily European | PM2.5                                        | Air pollution | 1949 | 14   |
| <a href="https://doi.org/10.1016/j.envres.2022.112717">https://doi.org/10.1016/j.envres.2022.112717</a> | Replication                     | FDR<0.05  | EPIC | European                   | PM10                                         | Air pollution | 384  | 284  |
| <a href="https://doi.org/10.1016/j.envint.2016.03.020">https://doi.org/10.1016/j.envint.2016.03.020</a> | No replication or meta-analysis | FDR<0.05  | 450K | multi - primarily European | Proximity to roads                           | Air pollution | 471  | 7    |
| <a href="https://doi.org/10.1016/j.envint.2019.02.028">https://doi.org/10.1016/j.envint.2019.02.028</a> | No replication or meta-analysis | FWER<0.05 | 450K | multi                      | NO(2)                                        | Air pollution | 175  | N/A  |

|                                                                                                           |                                 |           |             |                            |                       |               |      |     |
|-----------------------------------------------------------------------------------------------------------|---------------------------------|-----------|-------------|----------------------------|-----------------------|---------------|------|-----|
| <a href="https://doi.org/10.1016/j.envint.2019.02.028">https://doi.org/10.1016/j.envint.2019.02.028</a>   | No replication or meta-analysis | FWER<0.05 | 450K        | multi                      | O(3)                  | Air pollution | 175  | N/A |
| <a href="https://doi.org/10.1289/ehp2034">https://doi.org/10.1289/ehp2034</a>                             | Replication                     | FDR<0.05  | 450K        | multi - primarily European | proximity to roadways | Air pollution | 482  | 4   |
| <a href="https://doi.org/10.1021/acs.est.7b06447">https://doi.org/10.1021/acs.est.7b06447</a>             | Meta-analysis                   | FDR<0.05  | 450K        | multi - primarily European | PM                    | Air pollution | 1235 | 1   |
| <a href="https://doi.org/10.3390/ijerph19063292">https://doi.org/10.3390/ijerph19063292</a>               | No replication or meta-analysis | FDR<0.05  | EPIC        | Asian                      | PM10 & NO2            | Air pollution | 383  | 7   |
| <a href="https://doi.org/10.1016/j.anai.2020.09.008">https://doi.org/10.1016/j.anai.2020.09.008</a>       | No replication or meta-analysis | P<0.05    | EPIC        | Asian                      | PM2.5                 | Air pollution | 48   | 0   |
| <a href="https://doi.org/10.1093/ije/dyv032">https://doi.org/10.1093/ije/dyv032</a>                       | Replication                     | FDR<0.10  | CHARM 2.0   | multi - primarily African  | Mercury               | Metal         | 141  | N/A |
| <a href="https://doi.org/10.1080/15592294.2018.1516453">https://doi.org/10.1080/15592294.2018.1516453</a> | Replication                     | p<1x10e-6 | 450K        | Asian                      | Arsenic               | Metal         | 44   | 380 |
| <a href="https://doi.org/10.1186/s12940-021-00754-7">10.1186/s12940-021-00754-7</a>                       | Meta-analysis                   | FDR<0.05  | EPIC & 450K | Asian & admixed/Latino     | Arsenic               | Metal         | 108  | 3   |
| <a href="https://doi.org/10.1186/s13148-021-01198-z">https://doi.org/10.1186/s13148-021-01198-z</a>       | No replication or meta-analysis | FDR<0.05  | 450K        | multi - primarily European | Manganese (Mn)        | Metal         | 361  | 1   |
| <a href="https://doi.org/10.1186/s13148-021-01198-z">https://doi.org/10.1186/s13148-021-01198-z</a>       | No replication or meta-analysis | FDR<0.05  | 450K        | multi - primarily European | Copper (Cu)           | Metal         | 361  | 0   |
| <a href="https://doi.org/10.1186/s13148-021-01198-z">https://doi.org/10.1186/s13148-021-01198-z</a>       | No replication or meta-analysis | FDR<0.05  | 450K        | multi - primarily European | Selenium (Se)         | Metal         | 361  | 0   |
| <a href="https://doi.org/10.1186/s13148-021-01198-z">https://doi.org/10.1186/s13148-021-01198-z</a>       | No replication or meta-analysis | FDR<0.05  | 450K        | multi - primarily European | Magnesium (Mg)        | Metal         | 361  | 0   |
| <a href="https://doi.org/10.1186/s13148-021-01198-z">https://doi.org/10.1186/s13148-021-01198-z</a>       | No replication or meta-analysis | FDR<0.05  | 450K        | multi - primarily European | Arsenic (As)          | Metal         | 361  | 0   |
| <a href="https://doi.org/10.1186/s13148-021-01198-z">https://doi.org/10.1186/s13148-021-01198-z</a>       | No replication or meta-analysis | FDR<0.05  | 450K        | multi - primarily European | Cadmium (Cd)          | Metal         | 361  | 0   |

|                                                                                                           |                                 |            |      |                            |                  |       |     |     |
|-----------------------------------------------------------------------------------------------------------|---------------------------------|------------|------|----------------------------|------------------|-------|-----|-----|
| <a href="https://doi.org/10.1186/s13148-021-01198-z">https://doi.org/10.1186/s13148-021-01198-z</a>       | No replication or meta-analysis | FDR<0.05   | 450K | multi - primarily European | Lead (Pb)        | Metal | 361 | 1   |
| <a href="https://doi.org/10.1186/s13148-021-01198-z">https://doi.org/10.1186/s13148-021-01198-z</a>       | No replication or meta-analysis | FDR<0.05   | 450K | multi - primarily European | mercury (Hg)     | Metal | 361 | 0   |
| <a href="https://doi.org/10.1186/s13148-021-01198-z">https://doi.org/10.1186/s13148-021-01198-z</a>       | No replication or meta-analysis | FDR<0.05   | 450K | multi - primarily European | Zinc (Zn)        | Metal | 361 | 0   |
| <a href="https://doi.org/10.1186/s13148-021-01198-z">https://doi.org/10.1186/s13148-021-01198-z</a>       | No replication or meta-analysis | FDR<0.05   | 450K | multi - primarily European | Barium (ba)      | Metal | 361 | 0   |
| <a href="https://doi.org/10.1186/s13148-021-01198-z">https://doi.org/10.1186/s13148-021-01198-z</a>       | No replication or meta-analysis | FDR<0.05   | 450K | multi - primarily European | Chromium (Cr)    | Metal | 361 | 0   |
| <a href="https://doi.org/10.1186/s13148-021-01198-z">https://doi.org/10.1186/s13148-021-01198-z</a>       | No replication or meta-analysis | FDR<0.05   | 450K | multi - primarily European | Cesium (Cs)      | Metal | 361 | 0   |
| <a href="https://doi.org/10.1017/s2040174414000221">https://doi.org/10.1017/s2040174414000221</a>         | No replication or meta-analysis | FDR<0.05   | 450K | Asian                      | Arsenic          | Metal | 127 | 3   |
| <a href="https://doi.org/10.1080/15592294.2015.1046026">https://doi.org/10.1080/15592294.2015.1046026</a> | No replication or meta-analysis | Bonferroni | 450K | European                   | Arsenic; Mercury | Metal | 138 | 0   |
| <a href="https://doi.org/10.1080/15592294.2015.1105424">https://doi.org/10.1080/15592294.2015.1105424</a> | No replication or meta-analysis | Bonferroni | 450K | Asian                      | Arsenic          | Metal | 45  | 4   |
| <a href="https://doi.org/10.1038/s41598-017-00384-5">https://doi.org/10.1038/s41598-017-00384-5</a>       | No replication or meta-analysis | Bonferroni | 450K | multi - primarily European | Mercury          | Metal | 321 | 1   |
| <a href="https://doi.org/10.1289/EHP2085">https://doi.org/10.1289/EHP2085</a>                             | No replication or meta-analysis |            | WGBS | multi                      | Cadmium          | Metal | 19  | N/A |
| <a href="https://doi.org/10.1093/eep/dvv007">https://doi.org/10.1093/eep/dvv007</a>                       | No replication or meta-analysis | FDR<0.05   | 450K | Asian                      | Lead             | Metal | 127 | 9   |
| <a href="https://doi.org/10.1289/ehp2192">https://doi.org/10.1289/ehp2192</a>                             | Meta-analysis                   | FDR<0.05   | 450K | multi - primarily European | Cadmium          | Metal | 484 | 3   |
| <a href="https://doi.org/10.1289/ehp.1510437">https://doi.org/10.1289/ehp.1510437</a>                     | No replication or meta-analysis | FDR<0.05   | 450K | multi - primarily European | Aresnic          | Metal | 343 | 163 |
| <a href="https://doi.org/10.1093/eep/dvaa014">https://doi.org/10.1093/eep/dvaa014</a>                     | No replication or meta-analysis | FDR<0.05   | EPIC | Admixed/Latino             | Lead             | Metal | 420 | 0   |

|                                                                                                             |                                 |                                   |               |                            |                                 |       |      |     |
|-------------------------------------------------------------------------------------------------------------|---------------------------------|-----------------------------------|---------------|----------------------------|---------------------------------|-------|------|-----|
| <a href="https://doi.org/10.1186/s12940-017-0262-0">https://doi.org/10.1186/s12940-017-0262-0</a>           | Replication                     | FDR<0.05                          | 450K          | Asian                      | Arsenic                         | Metal | 64   | 579 |
| <a href="https://doi.org/10.1080/15592294.2019.1661211">https://doi.org/10.1080/15592294.2019.1661211</a>   | Meta-analysis                   | Bonferroni                        | 450K          | European                   | Copper                          | Metal | 447  | 0   |
| <a href="https://doi.org/10.4161/epi.28153">https://doi.org/10.4161/epi.28153</a>                           | No replication or meta-analysis | FDR<0.05                          | 450K          | Asian                      | Arsenic                         | Metal | 44   | 1   |
| <a href="https://doi.org/10.4161/epi.24401">https://doi.org/10.4161/epi.24401</a>                           | No replication or meta-analysis | FDR<0.05                          | 450K          | Asian                      | Cadmium                         | Metal | 127  | 0   |
| <a href="https://doi.org/10.1289/ehp.1205925">https://doi.org/10.1289/ehp.1205925</a>                       | No replication or meta-analysis | FDR<0.05                          | 450K          | European                   | Arsenic                         | Metal | 134  | 0   |
| <a href="https://doi.org/10.3390/nano11112871">https://doi.org/10.3390/nano11112871</a>                     | No replication or meta-analysis | p<0.00001                         | EPIC          | Asian                      | heavy metals - maternal lead    | Metal | 367  | 11  |
| <a href="https://doi.org/10.3390/nano11112871">https://doi.org/10.3390/nano11112871</a>                     | No replication or meta-analysis | p<0.00001                         | EPIC          | Asian                      | heavy metals - maternal cadmium | Metal | 367  | 4   |
| <a href="https://doi.org/10.3390/nano11112871">https://doi.org/10.3390/nano11112871</a>                     | No replication or meta-analysis | p<0.00001                         | EPIC          | Asian                      | heavy metals - prenatal lead    | Metal | 367  | 46  |
| <a href="https://doi.org/10.1016/j.envres.2021.112093">https://doi.org/10.1016/j.envres.2021.112093</a>     | Meta-analysis                   | FDR<0.10                          | 450K and EPIC | multi - primarily European | prenatal methylmercury          | Metal | 1462 | 2   |
| <a href="https://doi.org/10.1289/ehp.1408561">https://doi.org/10.1289/ehp.1408561</a>                       | No replication or meta-analysis | omnibus p = 0.017 and ___ > 0.125 | 450K          | multi - primarily European | Mercury                         | Metal | 41   | 0   |
| <a href="https://doi.org/10.1016/j.reprotox.2015.05.002">https://doi.org/10.1016/j.reprotox.2015.05.002</a> | No replication or meta-analysis | Bonferroni                        | 450K          | multi - primarily European | Manganese                       | Metal | 61   | 5   |
| <a href="https://doi.org/10.1016/j.envres.2015.02.004">https://doi.org/10.1016/j.envres.2015.02.004</a>     | No replication or meta-analysis | FDR<0.10                          | 450K          | multi - primarily European | Cadmium                         | Metal | 24   | 3   |
| <a href="https://doi.org/10.3390/ijerph17186775">https://doi.org/10.3390/ijerph17186775</a>                 | No replication or meta-analysis | FDR<0.2                           | EPIC          | multi - primarily European | Lead                            | Metal | 96   | 33  |
| <a href="https://doi.org/10.1016/j.envres.2021.110767">https://doi.org/10.1016/j.envres.2021.110767</a>     | Meta-analysis                   | FDR<0.05                          | EPIC          | Asian                      | Lead                            | Metal | 364  | 111 |
| <a href="https://doi.org/10.1016/j.envres.2022.113268">https://doi.org/10.1016/j.envres.2022.113268</a>     | Meta-analysis                   | FDR<0.05                          | EPIC          | Asian                      | Cadmium                         | Metal | 202  | 2   |
| <a href="https://doi.org/10.1016/j.envint.2022.107188">https://doi.org/10.1016/j.envint.2022.107188</a>     | Replication                     | FDR<0.05                          | 450K          | Asian                      | Cadmium                         | Metal | 71   | 458 |

|                                                                                                             |                                 |                          |                          |                            |                                    |                |     |      |
|-------------------------------------------------------------------------------------------------------------|---------------------------------|--------------------------|--------------------------|----------------------------|------------------------------------|----------------|-----|------|
| <a href="https://doi.org/10.1021/acs.chemrestox.7b00221">https://doi.org/10.1021/acs.chemrestox.7b00221</a> | No replication or meta-analysis | FDR<0.05                 | 450K                     | Admixed/Latino             | inorganic arsenic                  | Metal          | 59  | 3493 |
| <a href="https://doi.org/10.1093/toxsci/kfu210">https://doi.org/10.1093/toxsci/kfu210</a>                   | No replication or meta-analysis | FDR<0.05                 | 450K                     | Admixed/Latino             | Arsenic                            | Metal          | 38  | 4771 |
| <a href="https://doi.org/10.1177/2516865720938669">https://doi.org/10.1177/2516865720938669</a>             | No replication or meta-analysis | FDR<0.05                 | EPIC                     | Admixed/Latino             | lead                               | Metal          | 89  | 3    |
| <a href="https://doi.org/10.4161/epi.26798">https://doi.org/10.4161/epi.26798</a>                           | No replication or meta-analysis | P<0.05                   | MIRA                     | multi - primarily African  | Cadmium                            | Metal          | 17  | 0    |
| <a href="https://doi.org/10.1038/srep14466">https://doi.org/10.1038/srep14466</a>                           | No replication or meta-analysis | FDR<0.05                 | 450K                     | multi - primarily European | lead                               | Metal          | 35  | 183  |
| <a href="https://doi.org/10.1080/15592294.2015.1050172">https://doi.org/10.1080/15592294.2015.1050172</a>   | No replication or meta-analysis | FDR<0.05                 | 450K - modified for 5hmc | Admixed/Latino             | lead                               | Metal          | 48  | N/A  |
| <a href="https://doi.org/10.1016/j.envint.2020.105508">https://doi.org/10.1016/j.envint.2020.105508</a>     | Meta-analysis                   | FDR<0.05                 | 450K                     | multi - primarily European | Selenium                           | Metal          | 484 | 5    |
| <a href="https://doi.org/10.1289/ehp1246">https://doi.org/10.1289/ehp1246</a>                               | Replication                     | FDR<0.05                 | 450K                     | multi - primarily European | lead                               | Metal          | 268 | 4    |
| <a href="https://doi.org/10.1016/j.envres.2019.01.007">https://doi.org/10.1016/j.envres.2019.01.007</a>     | Replication                     | P<0.05                   | 450K                     | Asian                      | e-waste exposure (heavy metals)    | Metal          | 24  | 0    |
| <a href="https://doi.org/10.1016/j.envres.2018.01.009">https://doi.org/10.1016/j.envres.2018.01.009</a>     | No replication or meta-analysis | FDR<0.05                 | 450K                     | Asian                      | phthalate                          | Other chemical | 64  | 25   |
| <a href="https://doi.org/10.3390/ijerph16152786">https://doi.org/10.3390/ijerph16152786</a>                 | No replication or meta-analysis | FDR<0.10                 | EPIC                     | Asian                      | polychlorinated biphenyls          | Other chemical | 75  | 6    |
| <a href="https://doi.org/10.1186/s13148-018-0510-3">https://doi.org/10.1186/s13148-018-0510-3</a>           | No replication or meta-analysis | Bonferroni               | 450K                     | European                   | Artificial reproductive technology | Other chemical | 64  | 0    |
| <a href="https://doi.org/10.1038/s41598-018-24505-w">https://doi.org/10.1038/s41598-018-24505-w</a>         | No replication or meta-analysis | nominal p-value of 0.005 | EPIC                     | multi - primarily European | Phthalate                          | Other chemical | 16  | 0    |
| <a href="https://doi.org/10.1093/ije/dyv027">https://doi.org/10.1093/ije/dyv027</a>                         | No replication or meta-analysis | FDR<0.05                 | 450K                     | African                    | aflatoxin                          | Other chemical | 115 | 71   |
| <a href="https://doi.org/10.1016/j.envpol.2021.118024">https://doi.org/10.1016/j.envpol.2021.118024</a>     | No replication or meta-analysis | FDR<0.05                 | 450K                     | European                   | Phenols                            | Other chemical | 202 | 596  |

|                                                                                                               |                                 |            |      |                            |                                   |                |     |     |
|---------------------------------------------------------------------------------------------------------------|---------------------------------|------------|------|----------------------------|-----------------------------------|----------------|-----|-----|
| <a href="https://doi.org/10.1016/j.envint.2021.107054">https://doi.org/10.1016/j.envint.2021.107054</a>       | No replication or meta-analysis | FDR<0.05   | 450K | European                   | Phthalate metabolites (MEHP)      | Other chemical | 202 | 1   |
| <a href="https://doi.org/10.1186/s13148-018-0478-z">https://doi.org/10.1186/s13148-018-0478-z</a>             | No replication or meta-analysis | Bonferroni | 450K | European                   | BPA                               | Other chemical | 408 | 2   |
| <a href="https://doi.org/10.1016/j.envres.2017.06.013">https://doi.org/10.1016/j.envres.2017.06.013</a>       | No replication or meta-analysis | FDR<0.05   | 450K | multi - primarily European | PFOA                              | Other chemical | 44  | 0   |
| <a href="https://doi.org/10.1080/15592294.2018.1445901">https://doi.org/10.1080/15592294.2018.1445901</a>     | No replication or meta-analysis | FDR<0.05   | 450K | European                   | Chemical mixtures - PCB105        | Other chemical | 72  | 214 |
| <a href="https://doi.org/10.1080/15592294.2018.1445901">https://doi.org/10.1080/15592294.2018.1445901</a>     | No replication or meta-analysis | FDR<0.05   | 450K | European                   | Chemical mixtures - ppDDT         | Other chemical | 72  | 18  |
| <a href="https://doi.org/10.1080/15592294.2018.1445901">https://doi.org/10.1080/15592294.2018.1445901</a>     | No replication or meta-analysis | FDR<0.05   | 450K | European                   | Chemical mixtures - PCB101        | Other chemical | 72  | 10  |
| <a href="https://doi.org/10.1289/ehp10118">https://doi.org/10.1289/ehp10118</a>                               | Replication                     | FDR<0.05   | EPIC | multi - primarily European | PFAS                              | Other chemical | 266 | 435 |
| <a href="https://doi.org/10.1080/15592294.2021.1975917">https://doi.org/10.1080/15592294.2021.1975917</a>     | No replication or meta-analysis | FDR<0.05   | EPIC | European                   | prenatal exposure to PCBs/PCDD/Fs | Other chemical | 142 | 32  |
| <a href="https://doi.org/10.1093/eep/dvaa021">https://doi.org/10.1093/eep/dvaa021</a>                         | Replication                     | FDR<0.05   | EPIC | multi - primarily European | maternal BPA exposure             | Other chemical | 69  | 38  |
| <a href="https://doi.org/10.1016/j.envint.2018.03.004">https://doi.org/10.1016/j.envint.2018.03.004</a>       | Replication                     | FDR<0.05   | 450K | Asian                      | PFOS PFOA                         | Other chemical | 190 | 4   |
| <a href="https://doi.org/10.1038/s41598-019-48916-5">https://doi.org/10.1038/s41598-019-48916-5</a>           | Replication                     | FDR<0.05   | 450K | Asian                      | BPA                               | Other chemical | 277 | 27  |
| <a href="https://doi.org/10.1016/j.scitotenv.2021.147035">https://doi.org/10.1016/j.scitotenv.2021.147035</a> | Replication                     | FDR<0.05   | 450K | Asian                      | di-2-ethylhexyl phthalate         | Other chemical | 203 | 2   |
| <a href="https://doi.org/10.1186/s13148-020-00894-6">https://doi.org/10.1186/s13148-020-00894-6</a>           | No replication or meta-analysis | FDR<0.05   | 450K | multi                      | persistent organic pollutants     | Other chemical | 260 | 214 |
| <a href="https://doi.org/10.3389/fgene.2022.793278">https://doi.org/10.3389/fgene.2022.793278</a>             | No replication or meta-analysis | FDR<0.2    | EPIC | multi - primarily European | Phthalates                        | Other chemical | 262 | 0   |
| <a href="https://doi.org/10.1016/j.envint.2022.107183">https://doi.org/10.1016/j.envint.2022.107183</a>       | No replication or meta-analysis | FDR<0.05   | 450K | multi - primarily European | Phthalates                        | Other chemical | 78  | 12  |

|                                                                                                           |                                 |                                                                             |                            |                            |                        |                |      |     |
|-----------------------------------------------------------------------------------------------------------|---------------------------------|-----------------------------------------------------------------------------|----------------------------|----------------------------|------------------------|----------------|------|-----|
| <a href="https://doi.org/10.1016/j.envres.2020.110668">https://doi.org/10.1016/j.envres.2020.110668</a>   | No replication or meta-analysis | FDR<0.05                                                                    | EPIC                       | multi - primarily European | PFOA/PFOS              | Other chemical | 597  | 3   |
| <a href="https://doi.org/10.1016/j.envint.2018.12.017">https://doi.org/10.1016/j.envint.2018.12.017</a>   | No replication or meta-analysis | FDR<0.05                                                                    | 450K                       | multi - primarily European | swimming in pools      | Other chemical | 1033 | 0   |
| <a href="https://doi.org/10.1002/em.22095">https://doi.org/10.1002/em.22095</a>                           | No replication or meta-analysis | FDR<0.05                                                                    | 450K                       | Admixed/Latino             | phthalate              | Other chemical | 336  | 5   |
| <a href="https://doi.org/10.1289/ehp6888">https://doi.org/10.1289/ehp6888</a>                             | No replication or meta-analysis | FDR<0.05                                                                    | 450K                       | multi                      | PFAS                   | Other chemical | 583  | 1   |
| <a href="https://doi.org/10.2217/epi.15.91">https://doi.org/10.2217/epi.15.91</a>                         | Replication                     | FDR<0.05                                                                    | 450K                       | European                   | xenoestrogens          | Other chemical | 181  | 0   |
| <a href="https://doi.org/10.1016/j.envint.2020.106148">https://doi.org/10.1016/j.envint.2020.106148</a>   | No replication or meta-analysis | FDR<0.05                                                                    | EPIC                       | European                   | PFAS                   | Other chemical | 59   | 248 |
| <a href="https://doi.org/10.1016/j.lfs.2018.03.030">https://doi.org/10.1016/j.lfs.2018.03.030</a>         | Replication                     | P<0.05                                                                      | 450K                       | Asian                      | DDT pesticide          | Other chemical | 24   | 0   |
| <a href="https://doi.org/10.1093/ije/dyy259">https://doi.org/10.1093/ije/dyy259</a>                       | Replication                     | FDR<0.05                                                                    | 450K                       | European                   | Socioeconomic position | Stress         | 973  | 20  |
| <a href="https://doi.org/10.1371/journal.pone.0215745">https://doi.org/10.1371/journal.pone.0215745</a>   | No replication or meta-analysis | Bonferroni                                                                  | 450K                       | multi - primarily European | Circadian disruptions  | Stress         | 237  | 57  |
| <a href="https://doi.org/10.13110/humanbiology.91.2.04">https://doi.org/10.13110/humanbiology.91.2.04</a> | No replication or meta-analysis | Bonferroni                                                                  | 450K                       | African                    | Maternal stress        | Stress         | 24   | 0   |
| <a href="https://doi.org/10.1016/j.biopsy.2018.12.023">https://doi.org/10.1016/j.biopsy.2018.12.023</a>   | No replication or meta-analysis | Bonferroni                                                                  | 450K                       | European                   | childhood adversity    | Stress         | 691  | 38  |
| <a href="https://doi.org/10.2217/epi-2019-0040">https://doi.org/10.2217/epi-2019-0040</a>                 | No replication or meta-analysis | FDR<0.05                                                                    | 450K                       | multi - primarily European | SES                    | Stress         | 422  | 29  |
| <a href="https://doi.org/10.1080/15592294.2019.1614743">https://doi.org/10.1080/15592294.2019.1614743</a> | No replication or meta-analysis | FDR < 0.1.                                                                  | EPIC                       | multi - primarily European | maternal SES           | Stress         | 426  | 33  |
| <a href="https://doi.org/10.1038/ncomms6592">https://doi.org/10.1038/ncomms6592</a>                       | No replication or meta-analysis | FDR<0.05                                                                    | RRBS                       | European                   | famine                 | Stress         | 60   | N/A |
| <a href="https://doi.org/10.1038/srep28616">https://doi.org/10.1038/srep28616</a>                         | No replication or meta-analysis | DMRs, $\geq 3$ consecutive CpGs, $\Delta\text{meth} > 10\%$ , $t > \pm 4.5$ | WGBS followed by MassARRAY | European                   | maternal stress        | Stress         | 324  | N/A |

---

DMP: Differentially methylated positions. DMRs: Differentially methylated regions. SES: Socioeconomic status. RRBs: reduced representation bisulfite sequencing. WGBS: whole-genome bisulfite sequencing  
Some studies represented >1 time as multiple exposures were measured.  
Rows with N/A for Significant DMPs represent studies which did not report significance testing at position level (e.g. reported DMRs, external genomic annotations)
